# Supplementary material
Source: PubMed Central journal article supplement (PMC7610840)
Supplement: EMS124252-supplement-Supplementary_information.pdf [file EMS124252-supplement-Supplementary_information.pdf]

In the format provided by the authors and unedited.

# Geospatial immune variability illuminates differential evolution of lung adenocarcinoma

Khalid AbdulJabbar<sup>1,2,53</sup>, Shan E. Ahmed Raza<sup>1,2,53</sup>, Rachel Rosenthal<sup>3,4</sup>, Mariam Jamal-Hanjani<sup>3,5</sup>, Selvaraju Veeriah<sup>3,4</sup>, Ayse Akarca<sup>6</sup>, Tom Lund<sup>7</sup>, David A. Moore<sup>3,6</sup>, Roberto Salgado<sup>8,9</sup>, Maise Al Bakir<sup>4</sup>, Luis Zapata<sup>1,2</sup>, Crispin T. Hiley<sup>3,4</sup>, Leah Officer<sup>10</sup>, Marco Sereno<sup>11</sup>, Claire Rachel Smith<sup>11</sup>, Sherene Loi<sup>9</sup>, Allan Hackshaw<sup>12</sup>, Teresa Marafioti<sup>6</sup>, Sergio A. Quezada<sup>13</sup>, Nicholas McGranahan<sup>10,11,15</sup>, John Le Quesne<sup>10,11,15</sup>, TRACERx Consortium\*, Charles Swanton<sup>3,4,5,54</sup> and Yinyin Yuan<sup>1,2,54</sup>

<sup>1</sup>Centre for Evolution and Cancer, The Institute of Cancer Research, London, UK. <sup>2</sup>Division of Molecular Pathology, The Institute of Cancer Research, London, UK. <sup>3</sup>Cancer Research UK Lung Cancer Centre of Excellence, University College London Cancer Institute, London, UK. <sup>4</sup>Cancer Evolution and Genome Instability Laboratory, The Francis Crick Institute, London, UK. <sup>5</sup>Department of Medical Oncology, University College London Hospitals NHS Foundation Trust, London, UK. <sup>6</sup>Department of Cellular Pathology, University College London, University College Hospital, London, UK. <sup>7</sup>Translational Immune Oncology Group, Centre for Molecular Medicine, Royal Marsden Hospital NHS Trust, London, UK. <sup>8</sup>Department of Pathology, GZA-ZNA-Ziekenhuizen, Antwerp, Belgium. <sup>9</sup>Division of Research, Peter MacCallum Cancer Centre, University of Melbourne, Melbourne, Victoria, Australia. <sup>10</sup>MRC Toxicology Unit, University of Cambridge, Leicester, UK. <sup>11</sup>Leicester Cancer Research Centre, University of Leicester, Leicester, UK. <sup>12</sup>Cancer Research UK & University College London Cancer Trials Centre, University College London, London, UK. <sup>13</sup>Cancer Immunology Unit, University College London Cancer Institute, London, UK. <sup>14</sup>Cancer Genome Evolution Research Group, University College London Cancer Institute, University College London, London, UK. <sup>15</sup>Glenfield Hospital, University Hospitals Leicester NHS Trust, Leicester, UK. <sup>53</sup>These authors contributed equally: Khalid Abdul Jabbar, Shan E. Ahmed Raza. <sup>54</sup>These authors jointly supervised this work: Charles Swanton, Yinyin Yuan. \*A full list of authors and their affiliations appears at the end of the paper. ✉e-mail: [jlq2@leicester.ac.uk](mailto:jlq2@leicester.ac.uk); [Charles.Swanton@crick.ac.uk](mailto:Charles.Swanton@crick.ac.uk); [Yinyin.Yuan@icr.ac.uk](mailto:Yinyin.Yuan@icr.ac.uk)

STROBE Statement—Checklist of items that should be included in reports of *cohort studies*

|                                                    | Item No | Recommendation                                                                                                                                                                                                                                                                                                         |
|----------------------------------------------------|---------|------------------------------------------------------------------------------------------------------------------------------------------------------------------------------------------------------------------------------------------------------------------------------------------------------------------------|
| <b>Title and abstract</b><br>DONE                  | 1       | (a) Indicate the study’s design with a commonly used term in the title or the abstract<br>(b) Provide in the abstract an informative and balanced summary of what was done and what was found                                                                                                                          |
| <b>Introduction</b>                                |         |                                                                                                                                                                                                                                                                                                                        |
| Background/rationale<br>DONE                       | 2       | Explain the scientific background and rationale for the investigation being reported                                                                                                                                                                                                                                   |
| Objectives<br>DONE                                 | 3       | State specific objectives, including any prespecified hypotheses                                                                                                                                                                                                                                                       |
| <b>Methods</b>                                     |         |                                                                                                                                                                                                                                                                                                                        |
| Study design<br>DONE                               | 4       | Present key elements of study design early in the paper                                                                                                                                                                                                                                                                |
| Setting<br>DONE – methods/reporting summary        | 5       | Describe the setting, locations, and relevant dates, including periods of recruitment, exposure, follow-up, and data collection                                                                                                                                                                                        |
| Participants<br>DONE - reporting summary           | 6       | (a) Give the eligibility criteria, and the sources and methods of selection of participants. Describe methods of follow-up<br>(b) For matched studies, give matching criteria and number of exposed and unexposed                                                                                                      |
| Variables<br>DONE                                  | 7       | Clearly define all outcomes, exposures, predictors, potential confounders, and effect modifiers. Give diagnostic criteria, if applicable                                                                                                                                                                               |
| Data sources/ measurement<br>DONE                  | 8*      | For each variable of interest, give sources of data and details of methods of assessment (measurement). Describe comparability of assessment methods if there is more than one group                                                                                                                                   |
| Bias<br>DONE – results/Fig3/Ext Fig 6              | 9       | Describe any efforts to address potential sources of bias                                                                                                                                                                                                                                                              |
| Study size<br>DONE – methods/Ext Fig 1             | 10      | Explain how the study size was arrived at                                                                                                                                                                                                                                                                              |
| Quantitative variables<br>DONE                     | 11      | Explain how quantitative variables were handled in the analyses. If applicable, describe which groupings were chosen and why                                                                                                                                                                                           |
| Statistical methods<br>DONE                        | 12      | (a) Describe all statistical methods, including those used to control for confounding<br>(b) Describe any methods used to examine subgroups and interactions<br>(c) Explain how missing data were addressed<br>(d) If applicable, explain how loss to follow-up was addressed<br>(e) Describe any sensitivity analyses |
| <b>Results</b>                                     |         |                                                                                                                                                                                                                                                                                                                        |
| Participants<br>DONE – CONSRT diagram in Ext Fig 1 | 13*     | (a) Report numbers of individuals at each stage of study—eg numbers potentially eligible, examined for eligibility, confirmed eligible, included in the study, completing follow-up, and analysed<br>(b) Give reasons for non-participation at each stage<br>(c) Consider use of a flow diagram                        |
| Descriptive data                                   | 14*     | (a) Give characteristics of study participants (eg demographic, clinical, social)                                                                                                                                                                                                                                      |

|                          |     |                                                                                                                                                                                                              |
|--------------------------|-----|--------------------------------------------------------------------------------------------------------------------------------------------------------------------------------------------------------------|
|                          |     | and information on exposures and potential confounders                                                                                                                                                       |
|                          |     | (b) Indicate number of participants with missing data for each variable of interest                                                                                                                          |
|                          |     | (c) Summarise follow-up time (eg, average and total amount)                                                                                                                                                  |
| Outcome data             | 15* | Report numbers of outcome events or summary measures over time                                                                                                                                               |
| <b>DONE</b>              |     |                                                                                                                                                                                                              |
| Main results             | 16  | (a) Give unadjusted estimates and, if applicable, confounder-adjusted estimates and their precision (eg, 95% confidence interval). Make clear which confounders were adjusted for and why they were included |
| <b>DONE</b>              |     |                                                                                                                                                                                                              |
|                          |     | (b) Report category boundaries when continuous variables were categorized                                                                                                                                    |
|                          |     | (c) If relevant, consider translating estimates of relative risk into absolute risk for a meaningful time period                                                                                             |
| Other analyses           | 17  | Report other analyses done—eg analyses of subgroups and interactions, and sensitivity analyses                                                                                                               |
| <b>DONE</b>              |     |                                                                                                                                                                                                              |
| <b>Discussion</b>        |     |                                                                                                                                                                                                              |
| Key results              | 18  | Summarise key results with reference to study objectives                                                                                                                                                     |
| <b>DONE</b>              |     |                                                                                                                                                                                                              |
| Limitations              | 19  | Discuss limitations of the study, taking into account sources of potential bias or imprecision. Discuss both direction and magnitude of any potential bias                                                   |
| <b>DONE</b>              |     |                                                                                                                                                                                                              |
| Interpretation           | 20  | Give a cautious overall interpretation of results considering objectives, limitations, multiplicity of analyses, results from similar studies, and other relevant evidence                                   |
| <b>DONE</b>              |     |                                                                                                                                                                                                              |
| Generalisability         | 21  | Discuss the generalisability (external validity) of the study results                                                                                                                                        |
| <b>DONE</b>              |     |                                                                                                                                                                                                              |
| <b>Other information</b> |     |                                                                                                                                                                                                              |
| Funding                  | 22  | Give the source of funding and the role of the funders for the present study and, if applicable, for the original study on which the present article is based                                                |
| <b>DONE</b>              |     |                                                                                                                                                                                                              |

\*Give information separately for exposed and unexposed groups.

**Note:** An Explanation and Elaboration article discusses each checklist item and gives methodological background and published examples of transparent reporting. The STROBE checklist is best used in conjunction with this article (freely available on the Web sites of PLoS Medicine at <http://www.plosmedicine.org/>, Annals of Internal Medicine at <http://www.annals.org/>, and Epidemiology at <http://www.epidem.com/>). Information on the STROBE Initiative is available at <http://www.strobe-statement.org>.

## Comparison of tissue segmentation performance between deep learning and classic machine learning

We implemented the Micro-Net<sup>1</sup> algorithm for tissue segmentation which has been shown to perform accurate segmentation compared to the state-of-the-art algorithms. Due to complex structures in histology slides or weak staining, classic machine learning algorithms often fail and are problematic to tune. This problem can be more complex while segmenting sections without Eosin or cytoplasmic staining such as IHC-stained images due to weak contrast between the tissue region and the background glass.

As an independent comparison, we experimented classic methods such as threshold, active contours<sup>2</sup>, watershed segmentation<sup>3</sup> and Support Vector Machines (SVM) based method trained on local binary pattern features<sup>4</sup> on 10 different images randomly selected from the TRACERx histology cohort (Supplementary Figures 1-20). Deep learning (MicroNet) outperformed all classic methods using various accuracy metrics as shown in Supplementary Table 6.

Supplementary Figure 10 demonstrates the effect of weaker staining on threshold and active contours algorithms, whereas MicroNet consistently performed better on all the images. The watershed algorithm segmented multiple regions in all images, with such variation, it was very hard to fine-tune the algorithm in order to merge all relevant tissue regions into a single segment. For SVM, the local binary patterns (LBP) features were extracted to segment the tissue regions, however, a major limitation can be observed in the form of discarding Eosin only areas, as shown on Supplementary Figure 9 and Supplementary Figure 21.

### Supplementary Table 6: Quantitative comparison of tissue segmentation results for proposed (Micro-Net) vs classic machine learning.

| Method    | Dice        | Object Dice | Pixel Accuracy | F1-Score    |
|-----------|-------------|-------------|----------------|-------------|
| Threshold | 0.631500453 | 0.491553304 | 0.699176744    | 0.000949264 |
| Watershed | 0.38605082  | 0.370697822 | 0.447965797    | 0.176859504 |
| Chan_Vese | 0.598405502 | 0.469242029 | 0.667303606    | 0.000914946 |
| SVM_LBP   | 0.917539751 | 0.915315159 | 0.910894913    | 0.749012437 |
| MicroNet  | 0.961247872 | 0.955819821 | 0.964068566    | 0.773748864 |

1. Raza, S. E. A. *et al.* Micro-Net: A unified model for segmentation of various objects in microscopy images. *Med. Image Anal.* **52**, 160–173 (2019).
2. Chan, T. F., Sandberg, B. Y. & Vese, L. A. Active Contours without Edges for Vector-Valued Images. *J. Vis. Commun. Image Represent.* **11**, 130–141 (2000).
3. Meyer, F. Topographic distance and watershed lines. *Signal Processing* **38**, 113–125 (1994).
4. Ojala, T., Pietikainen, M. & Maenpaa, T. Multiresolution gray-scale and rotation invariant texture classification with local binary patterns. *IEEE Trans. Pattern Anal. Mach. Intell.* **24**, 971–987 (2002).

**Supplementary Figures 1-20: comparison of H&E tissue segmentation across five different methods: MicroNet, threshold, active contours, watershed segmentation and SVM based method trained on local binary pattern features.** Supplementary Figures 1-10 show the results for segmenting entire diagnostic slides and Supplementary Figures 11-20 show various zoomed-in examples.

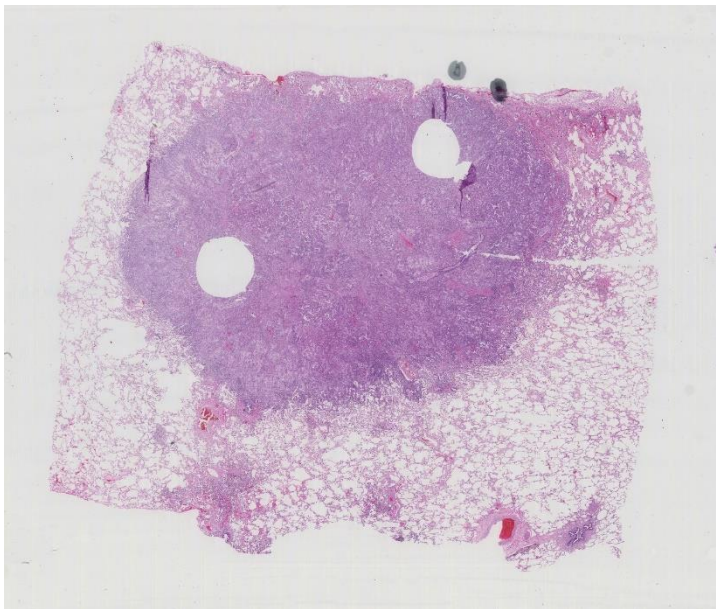

Raw Image

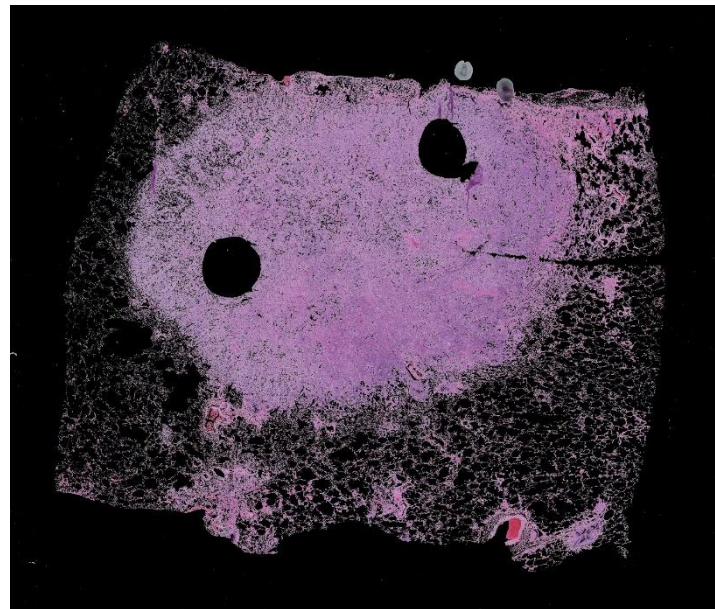

Threshold

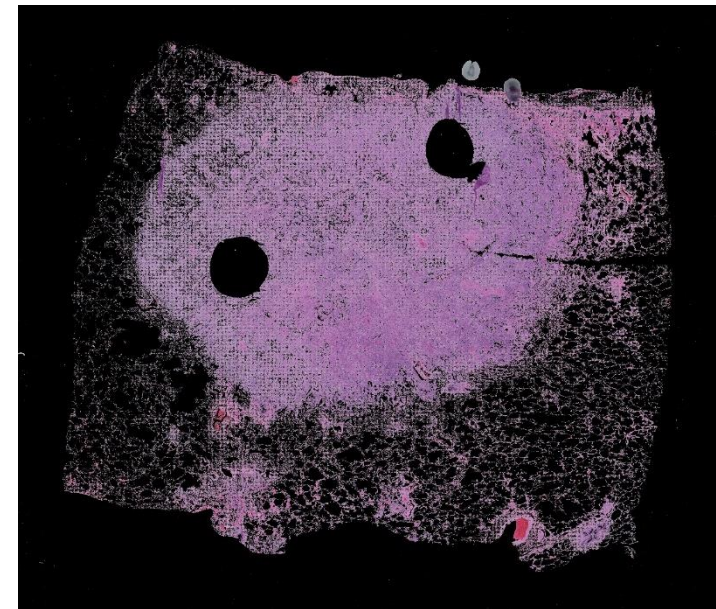

Active Contours

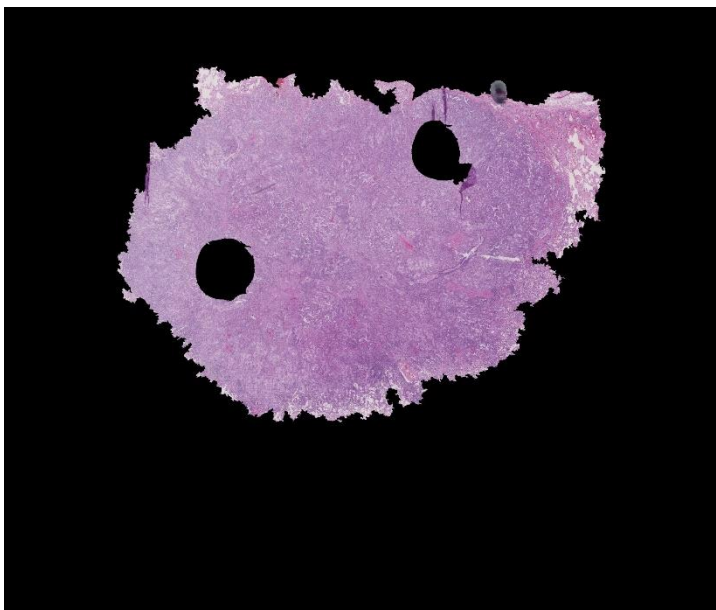

Watershed

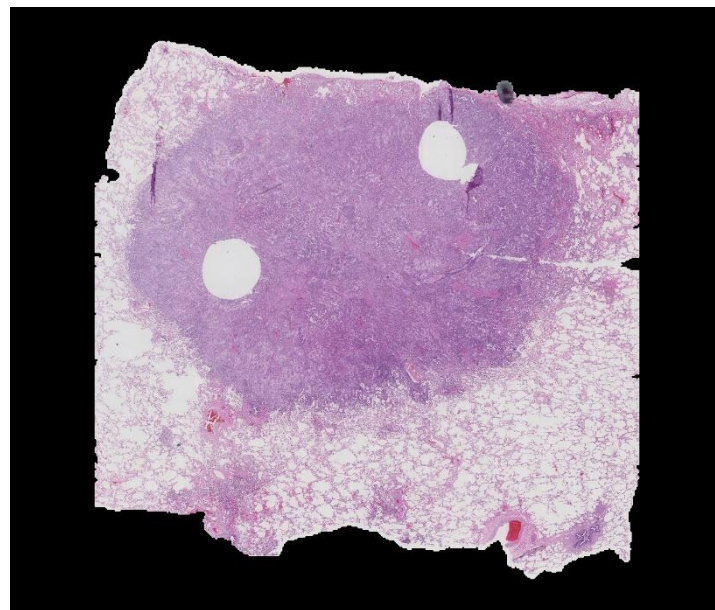

SVM using LBP features

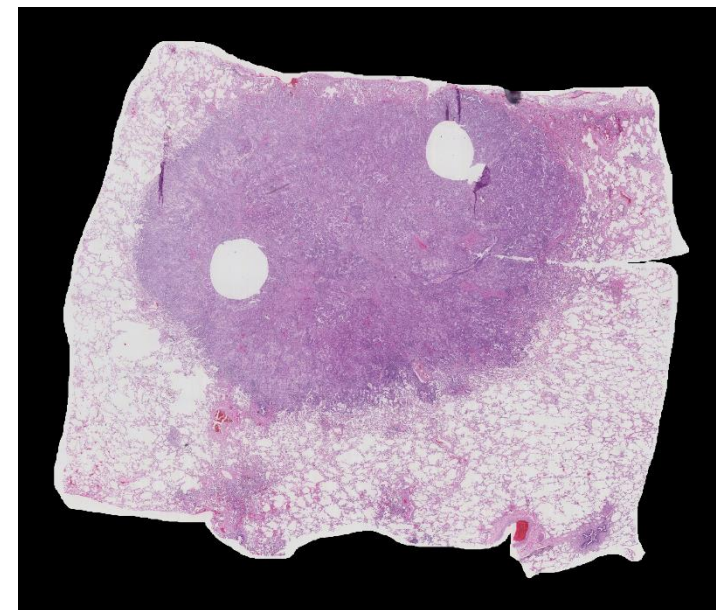

Micro-Net

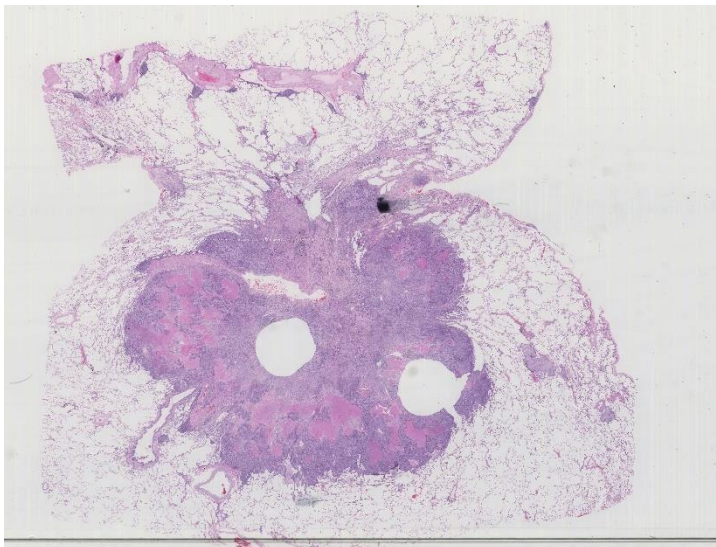

Raw Image

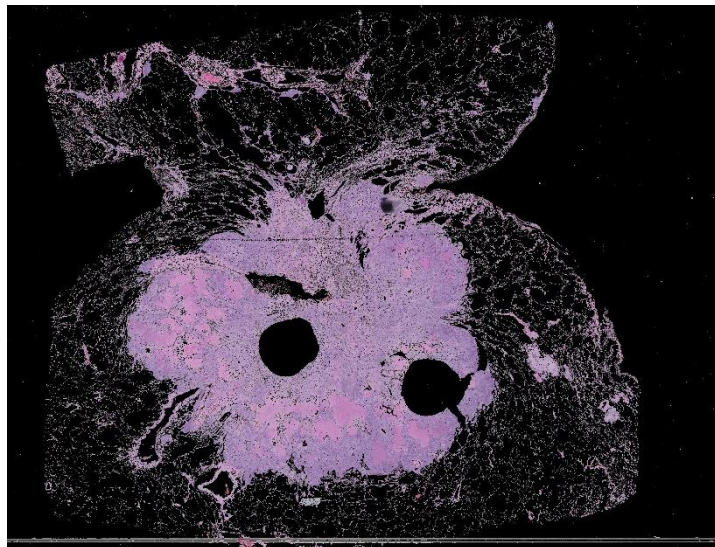

Threshold

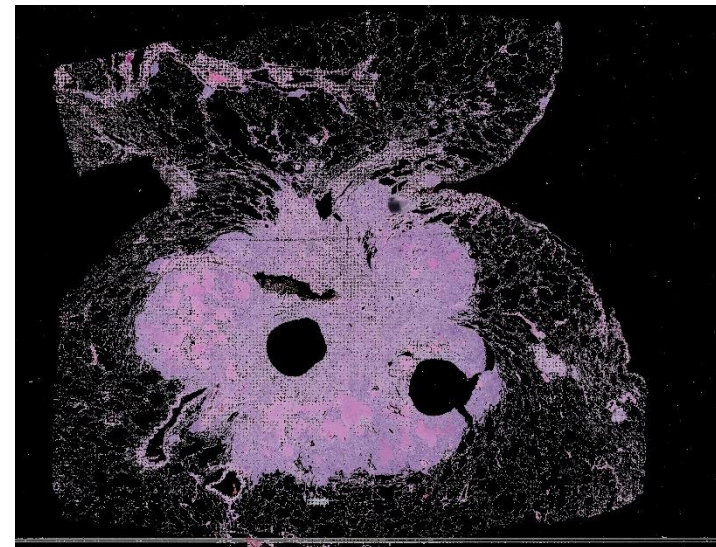

Active Contours

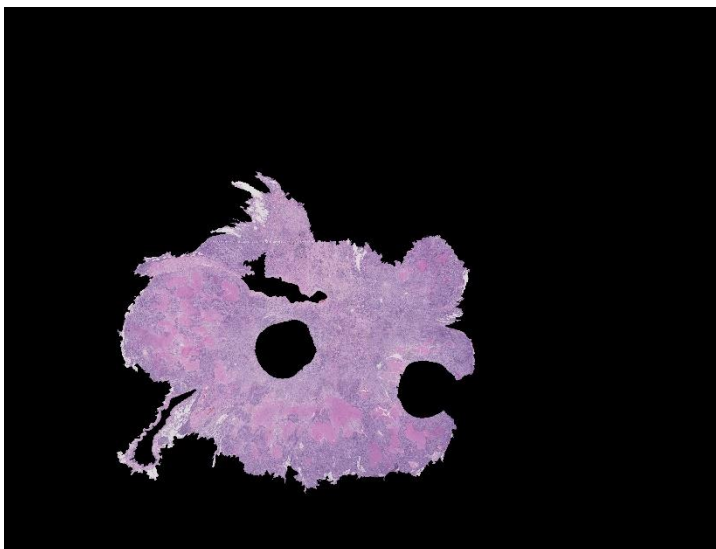

Watershed

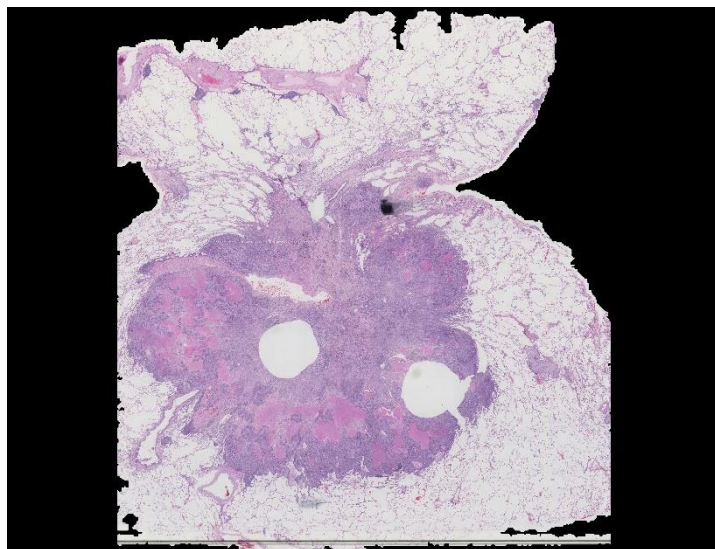

SVM using LBP features

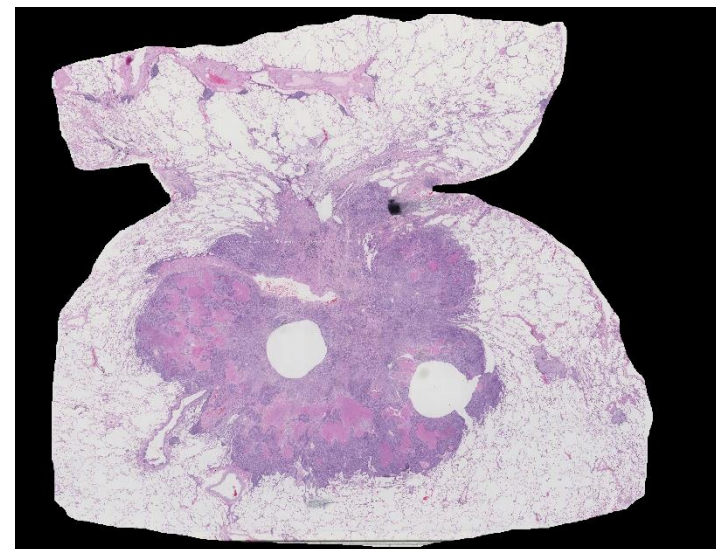

Micro-Net

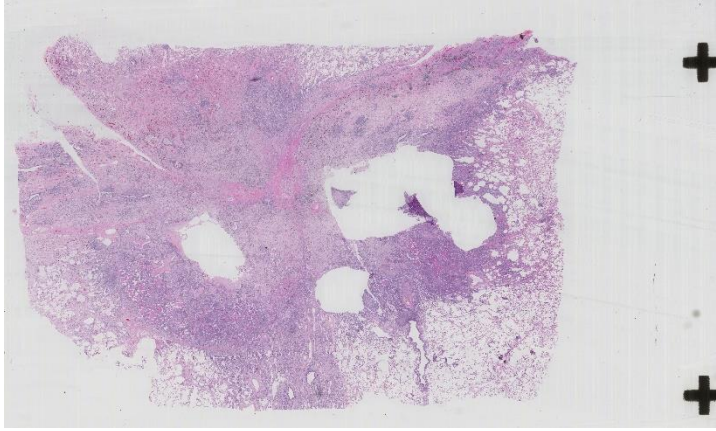

Raw Image

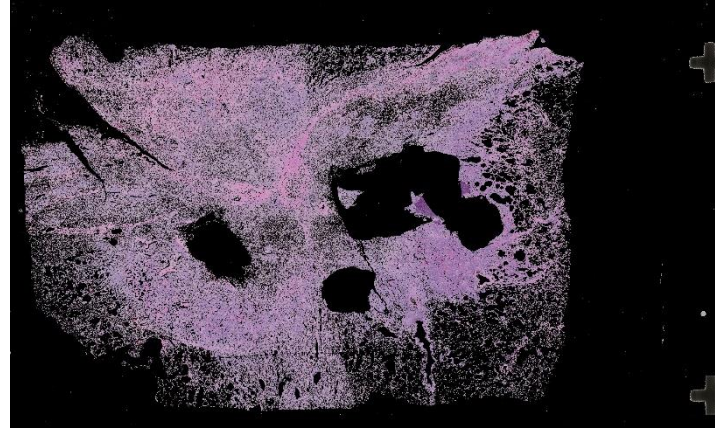

Threshold

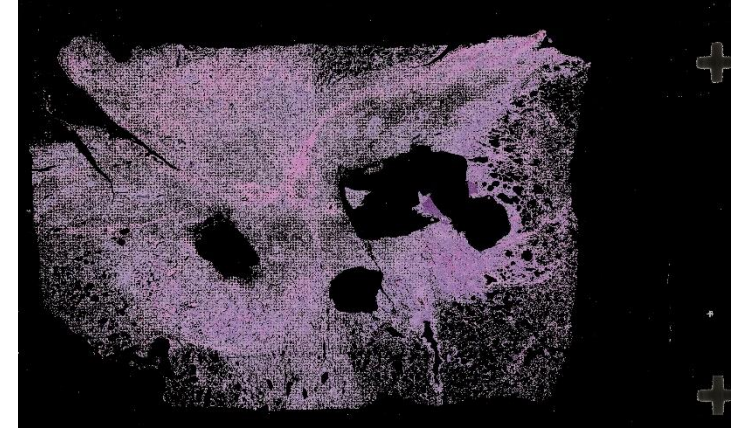

Active Contours

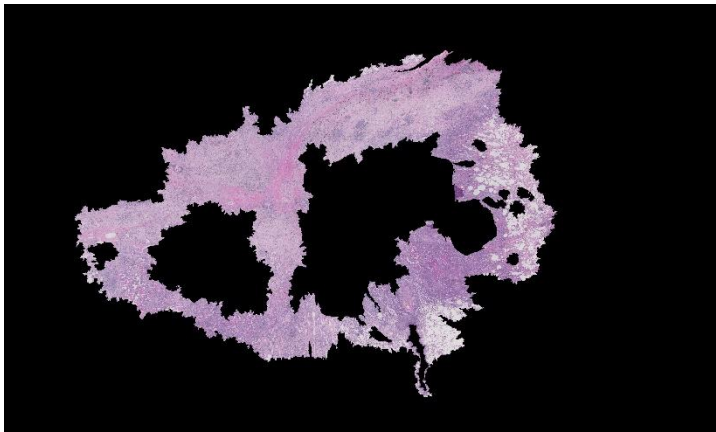

Watershed

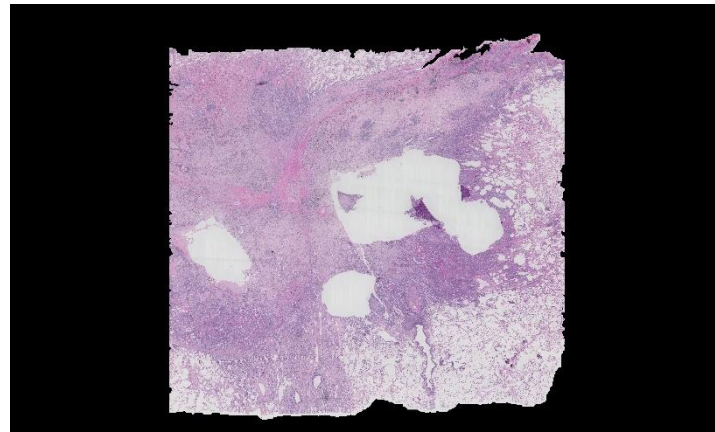

SVM using LBP features

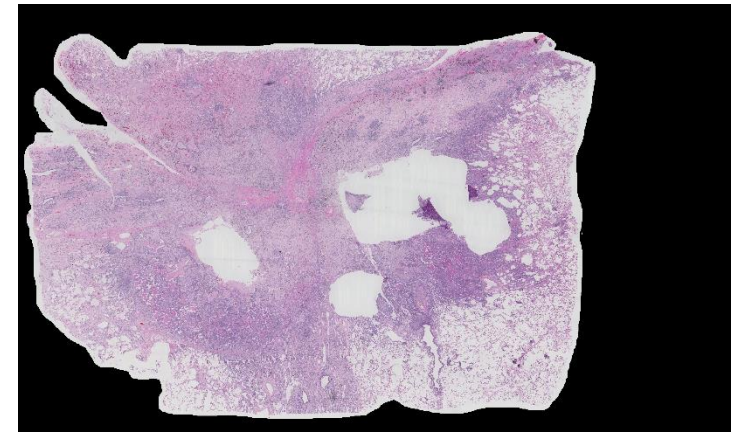

Micro-Net

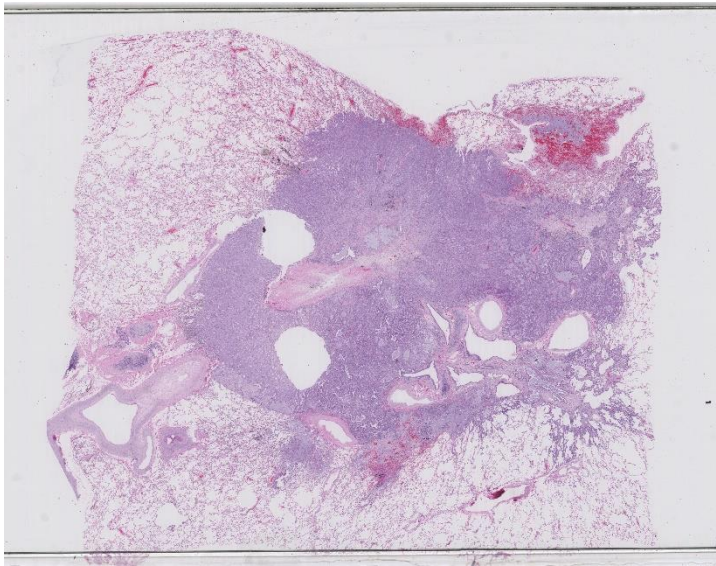

Raw Image

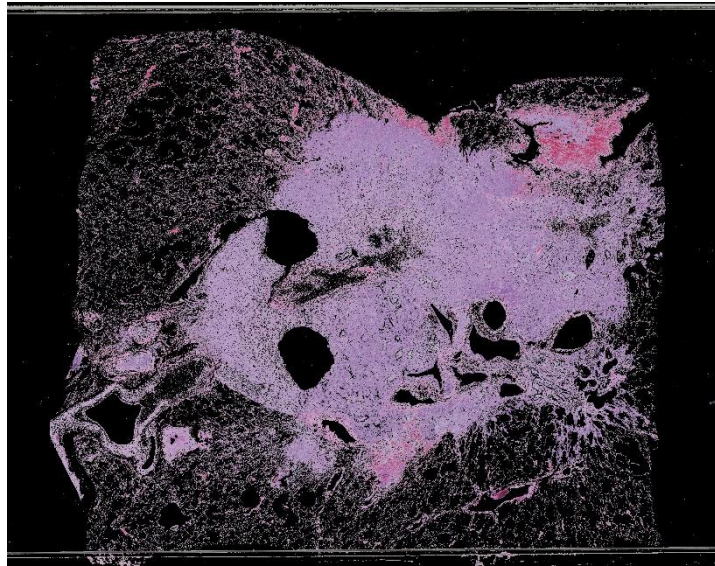

Threshold

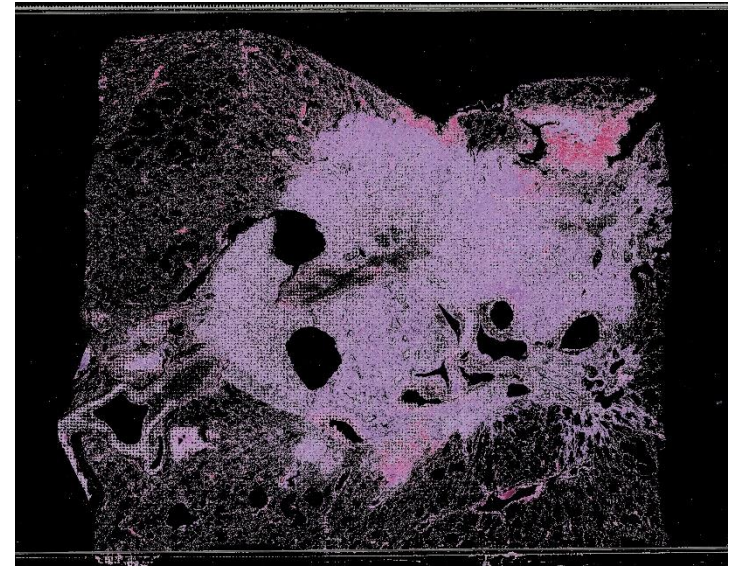

Active Contours

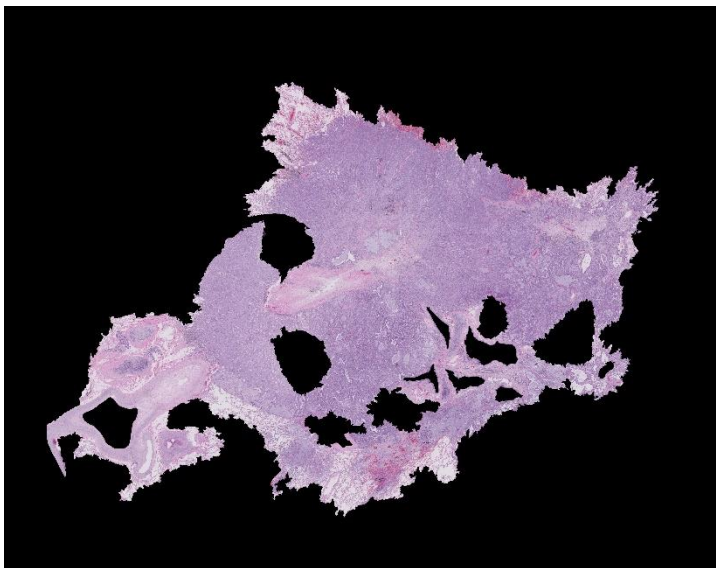

Watershed

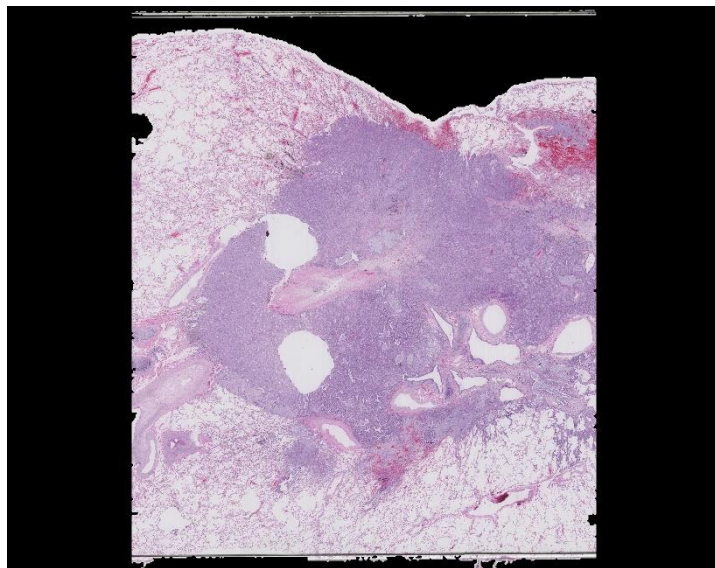

SVM using LBP features

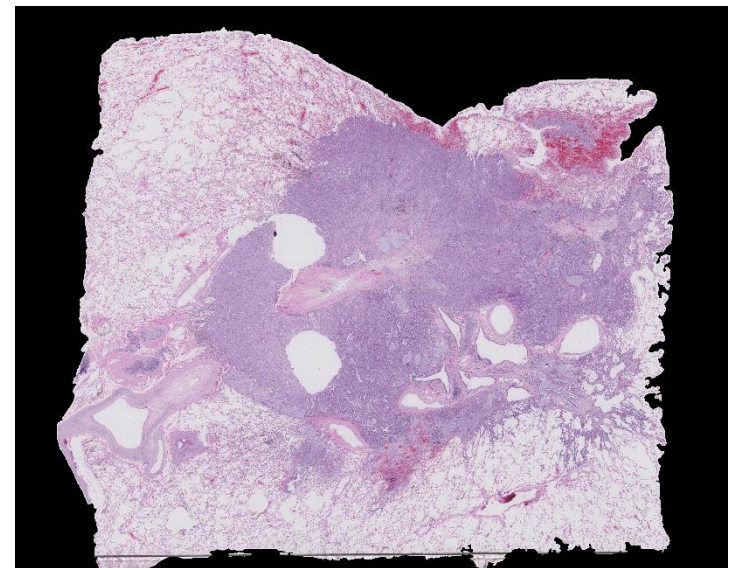

Micro-Net



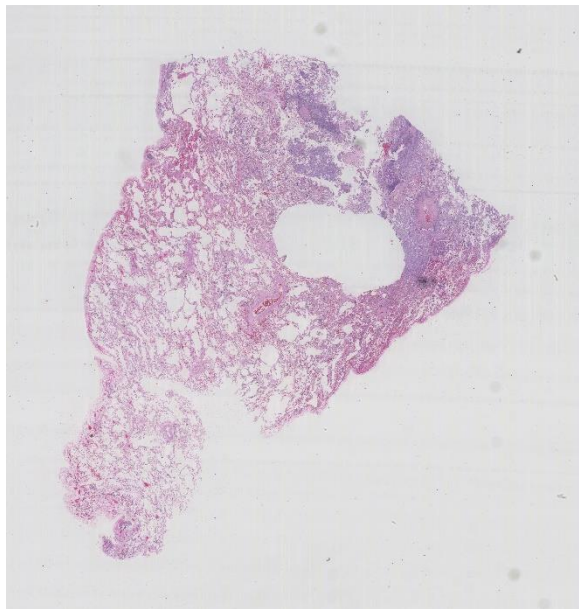

Raw Image

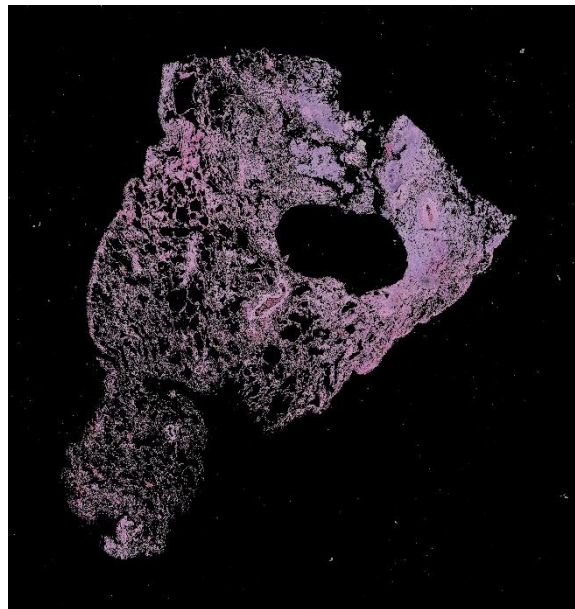

Threshold

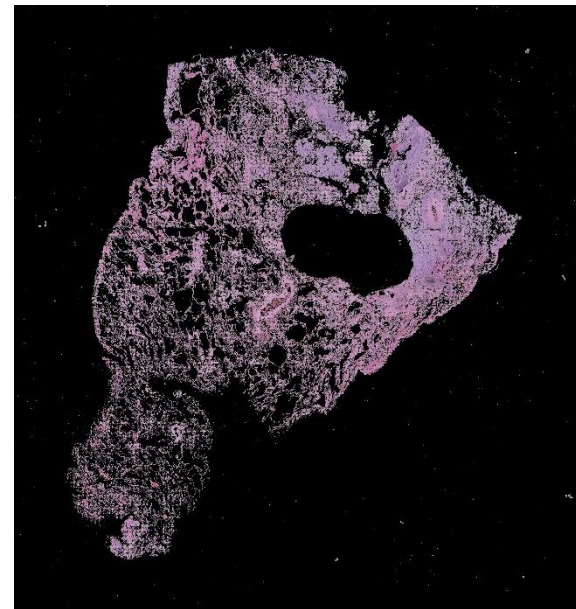

Active Contours

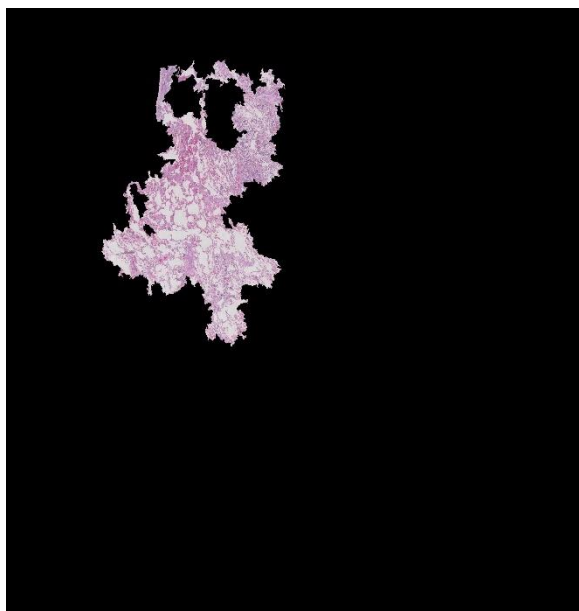

Watershed

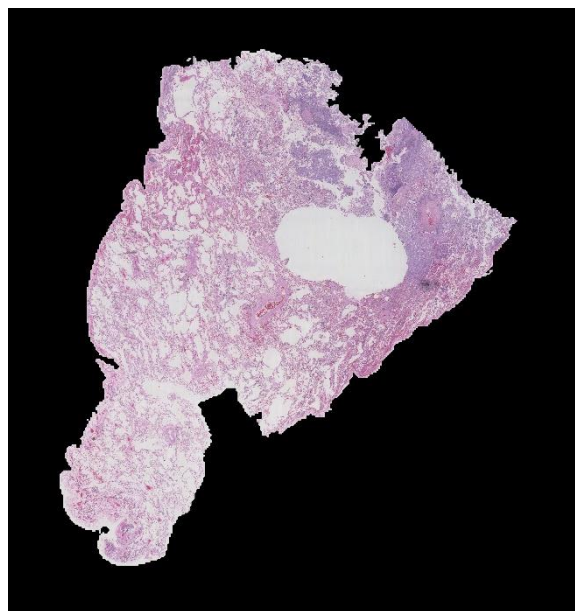

SVM using LBP features

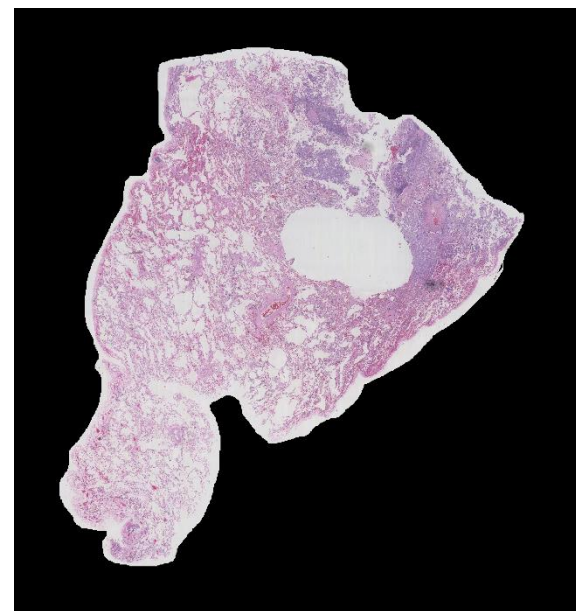

Micro-Net

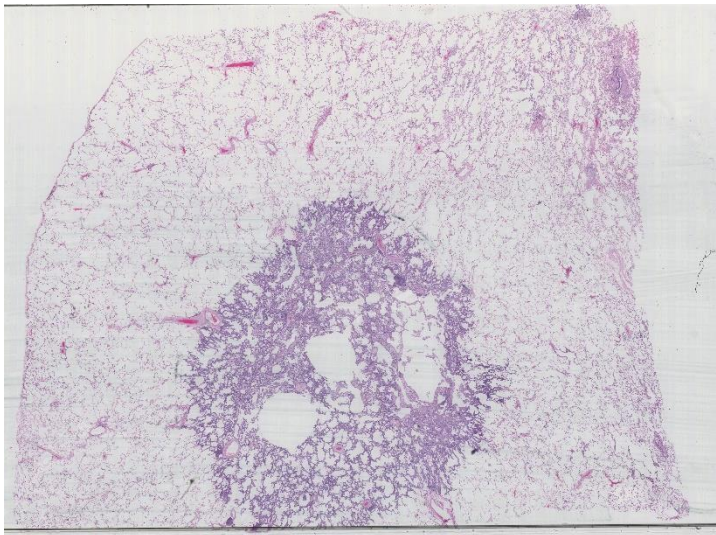

Raw Image

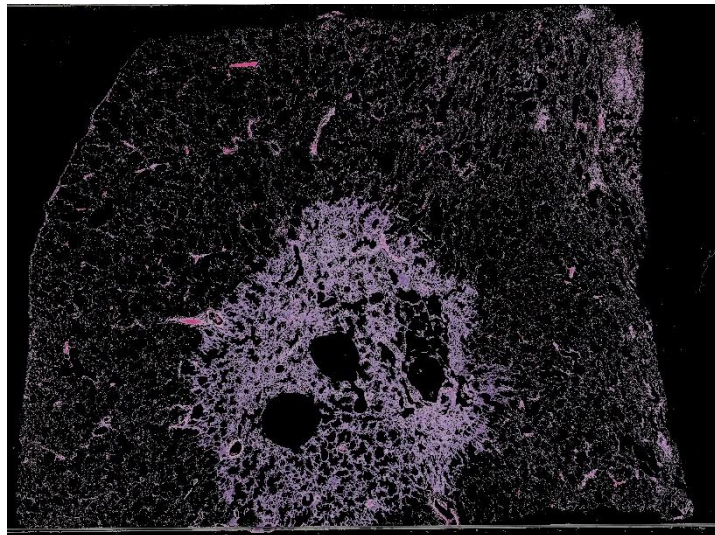

Threshold

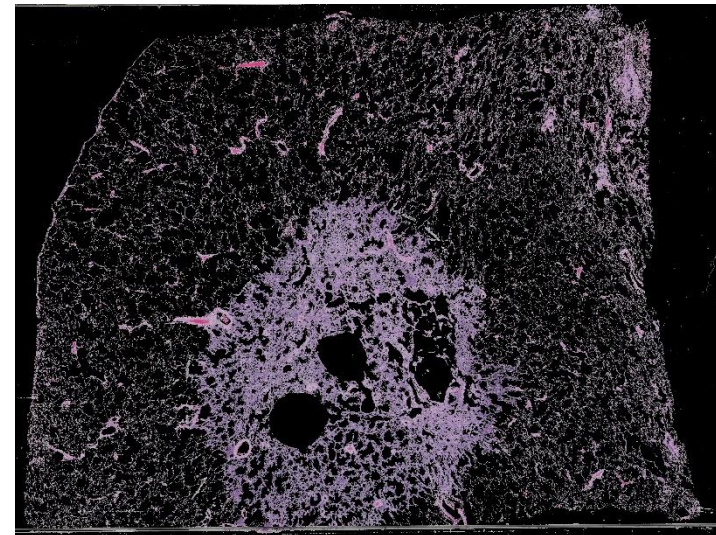

Active Contours

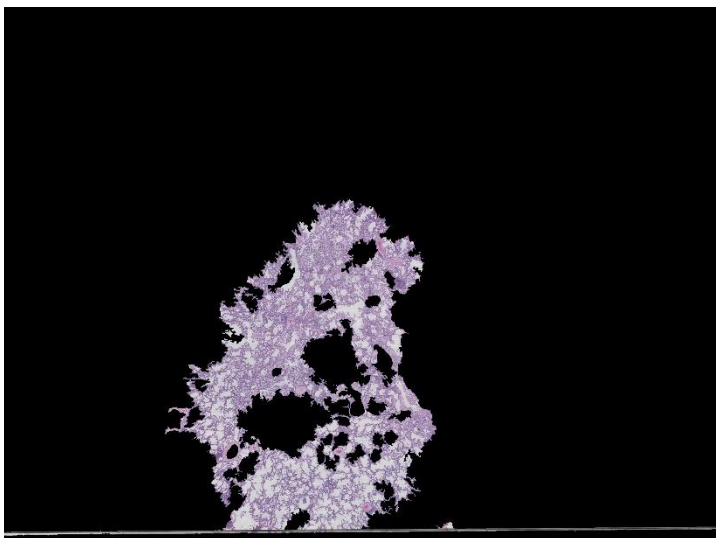

Watershed

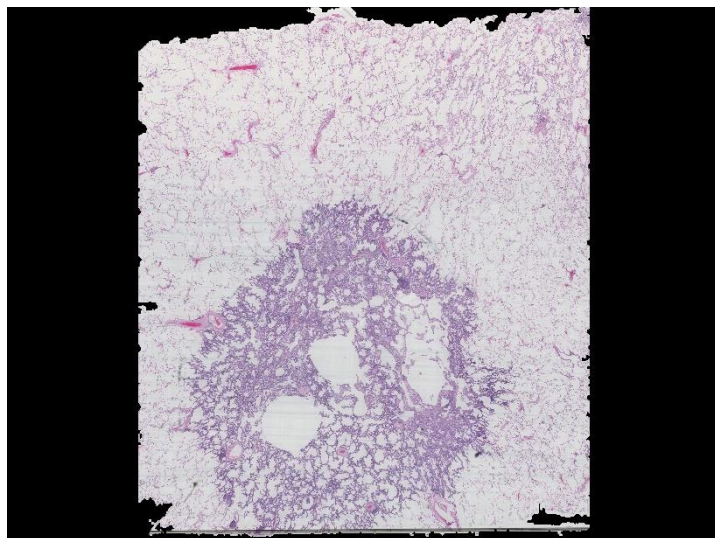

SVM using LBP features

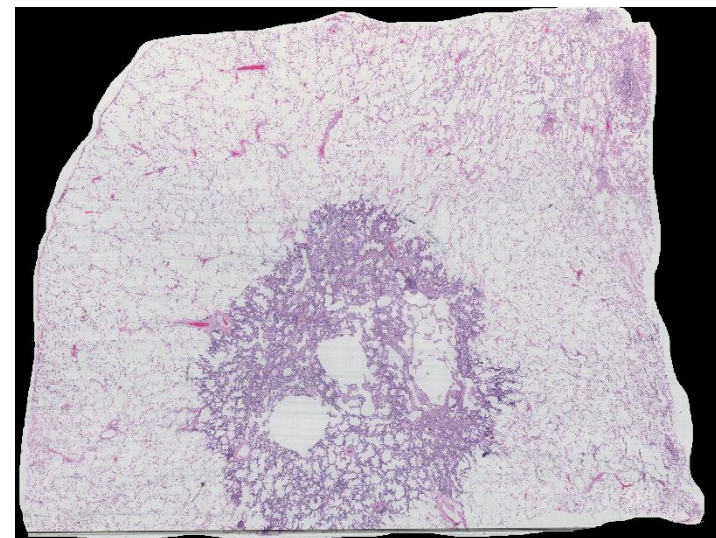

Micro-Net

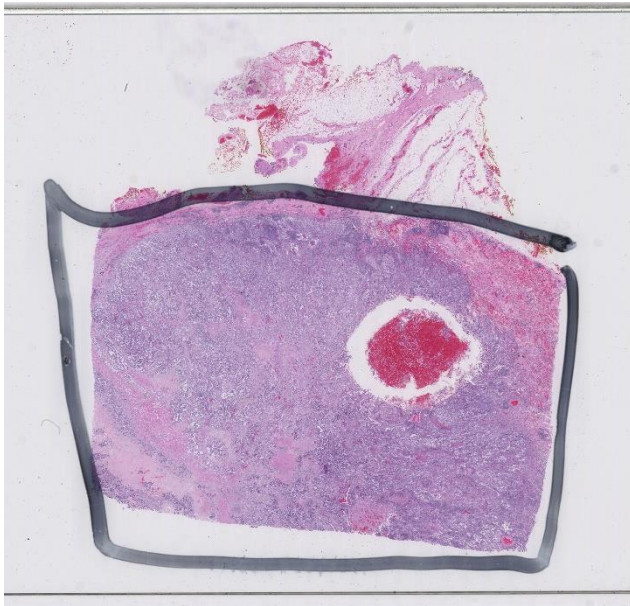

Raw Image

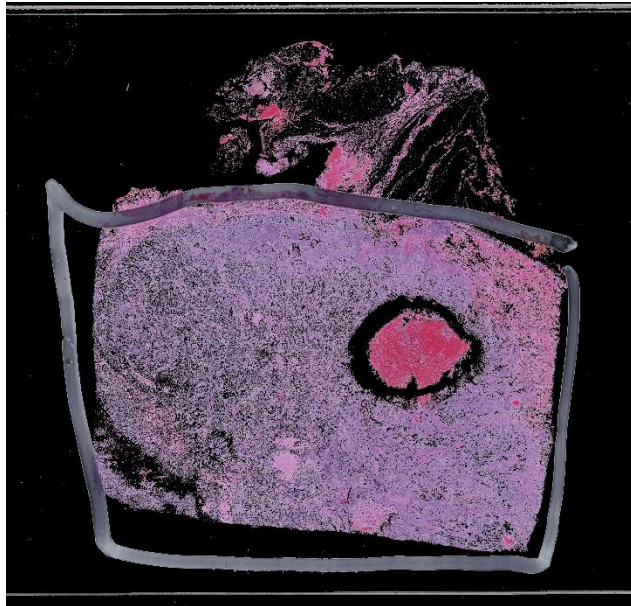

Threshold

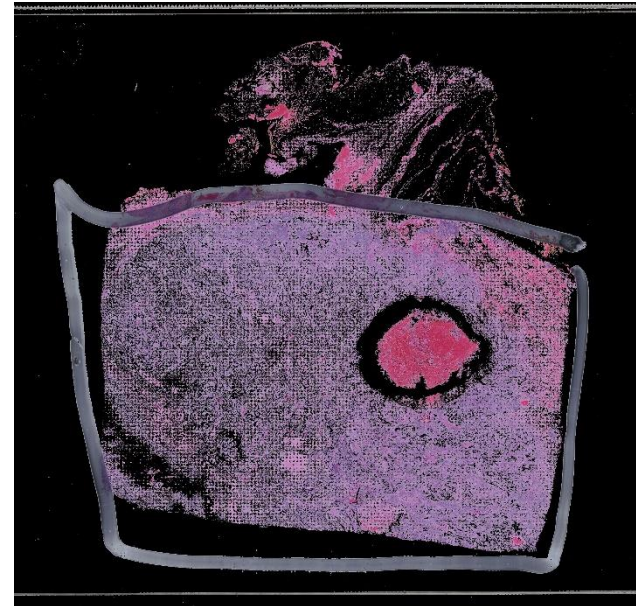

Active Contours

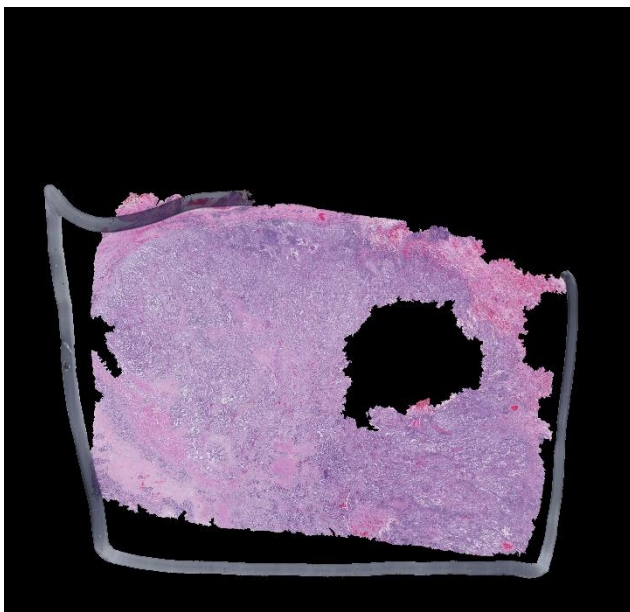

Watershed

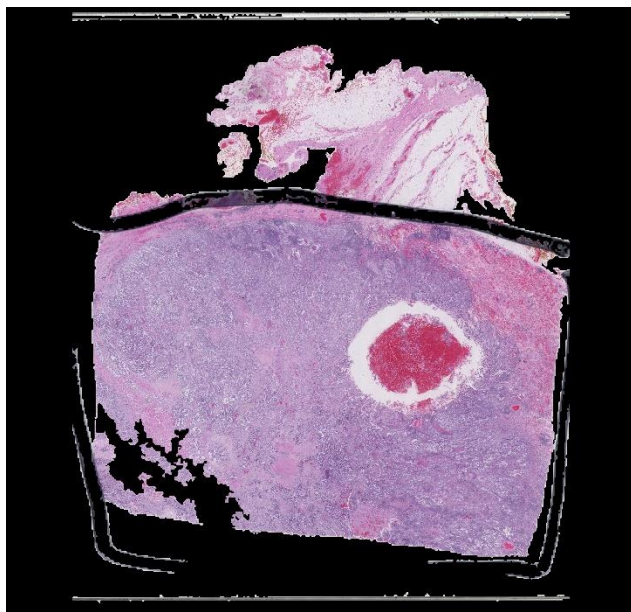

SVM using LBP features

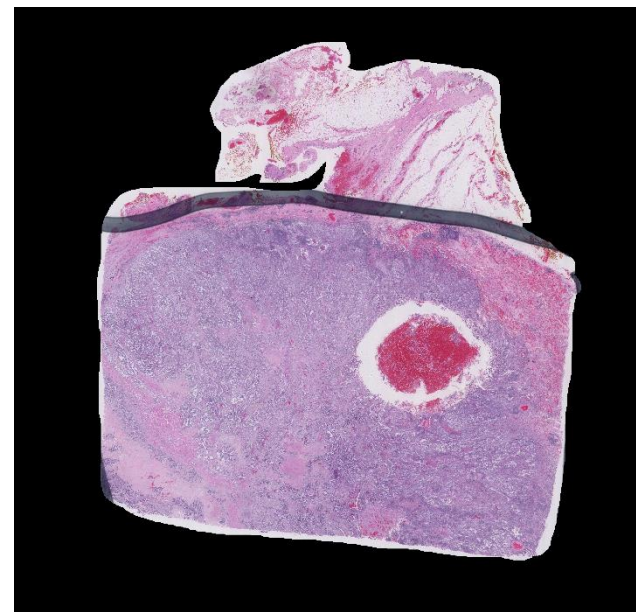

Micro-Net

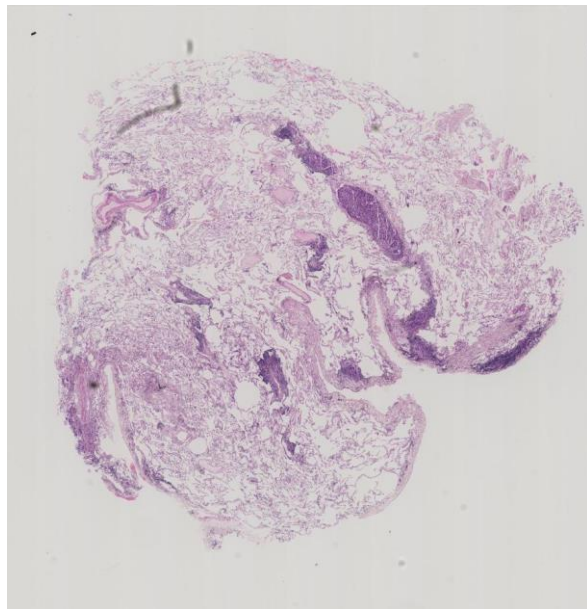

Raw Image

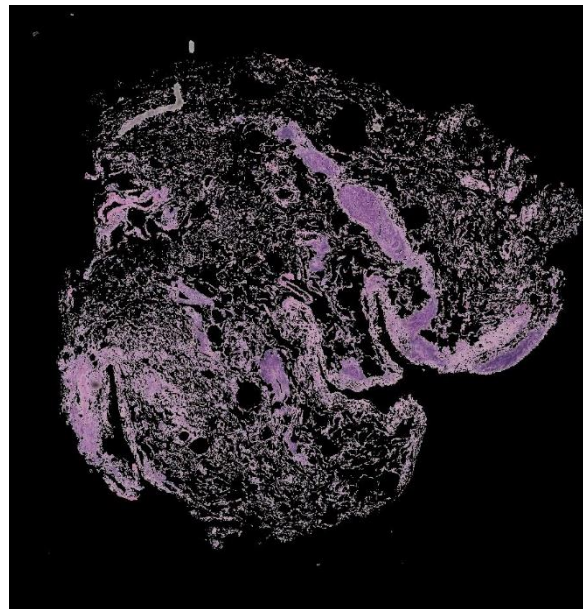

Threshold

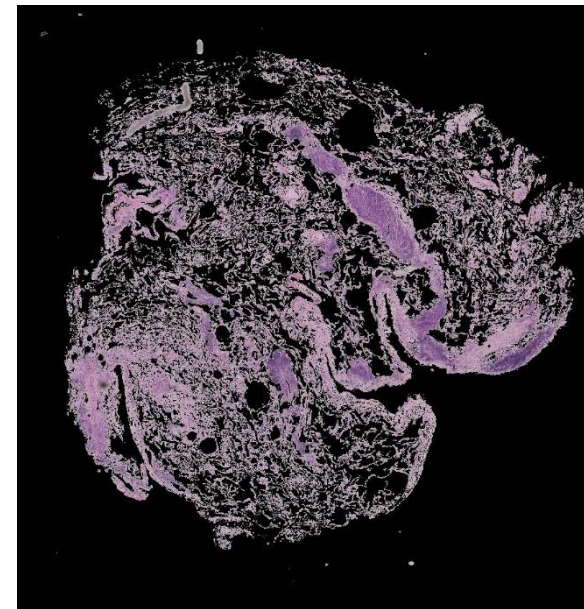

Active Contours

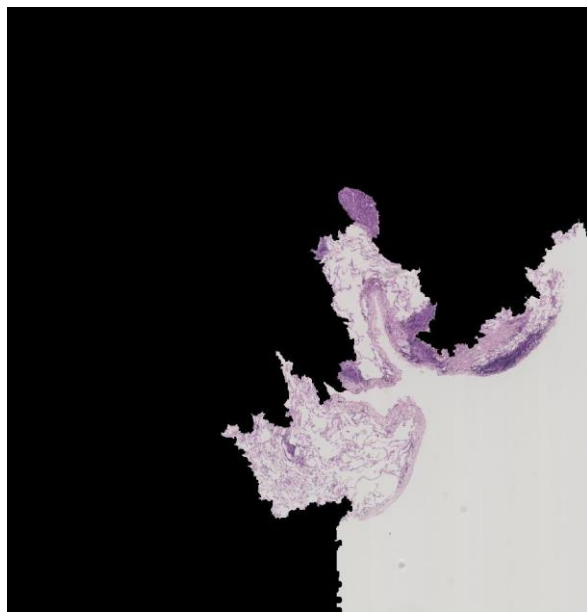

Watershed

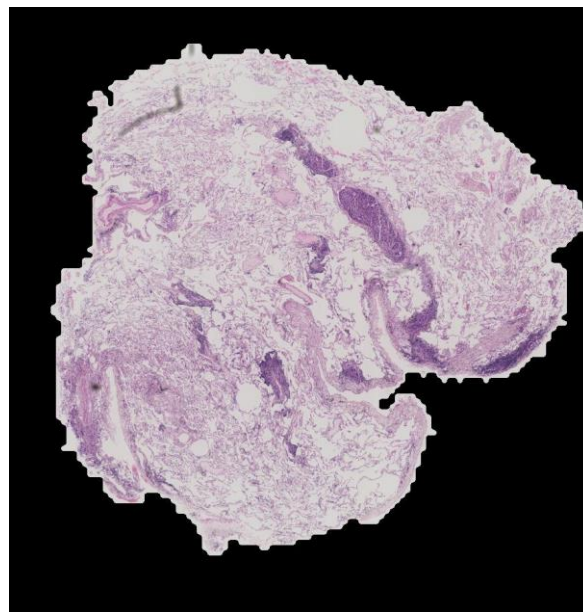

SVM using LBP features

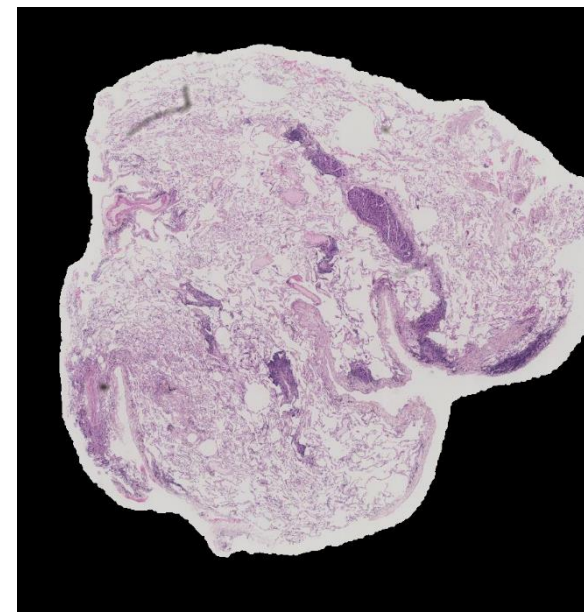

Micro-Net

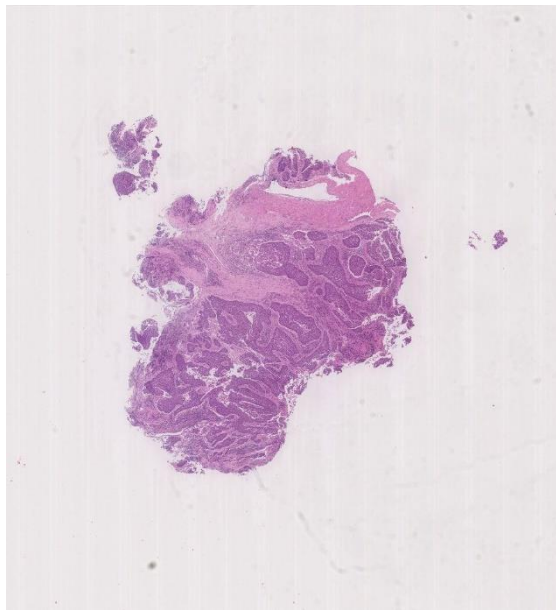

Raw Image

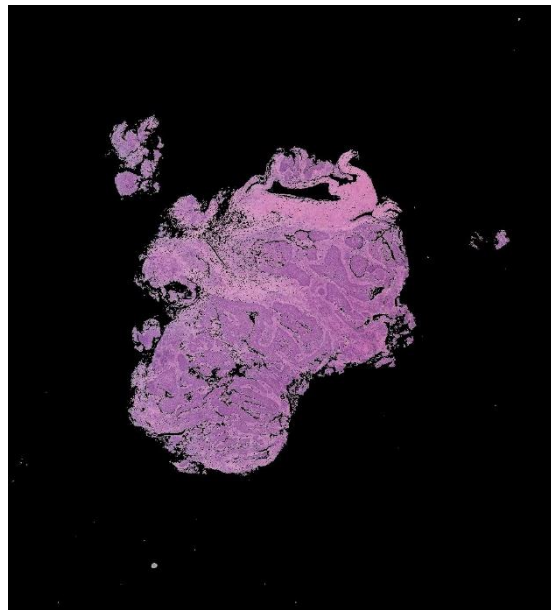

Threshold

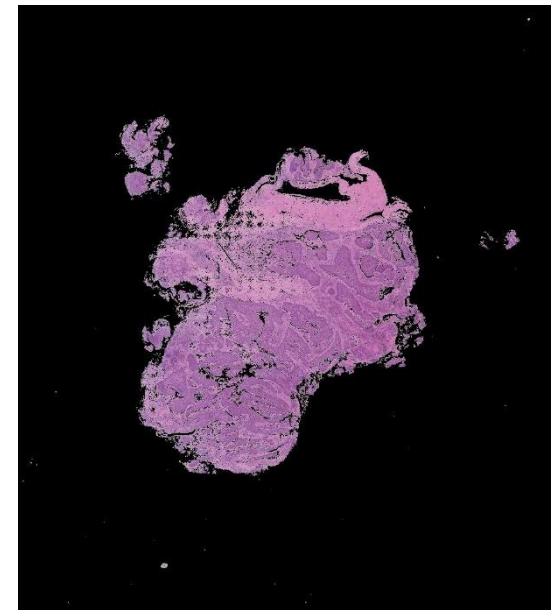

Active Contours

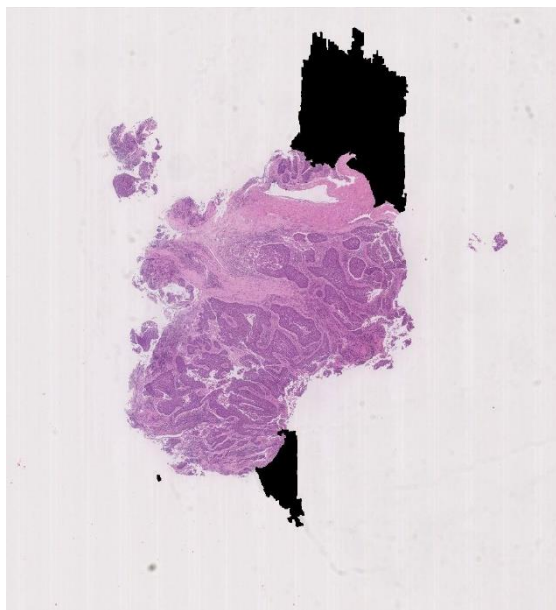

Watershed

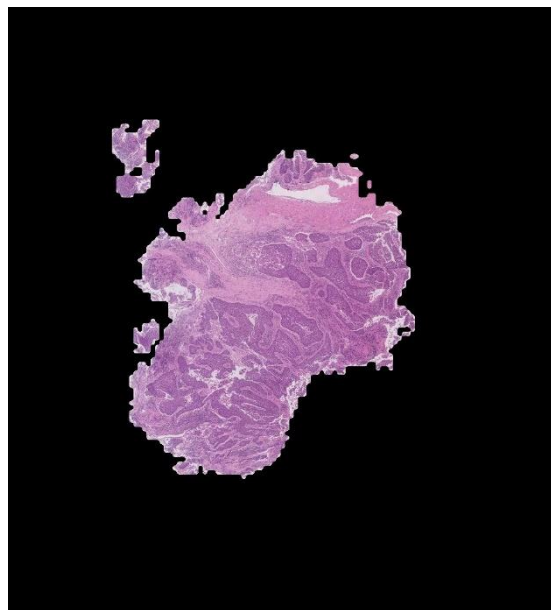

SVM using LBP features

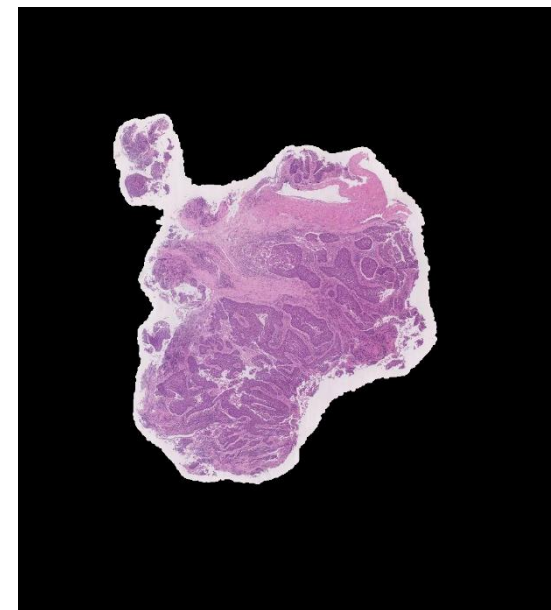

Micro-Net

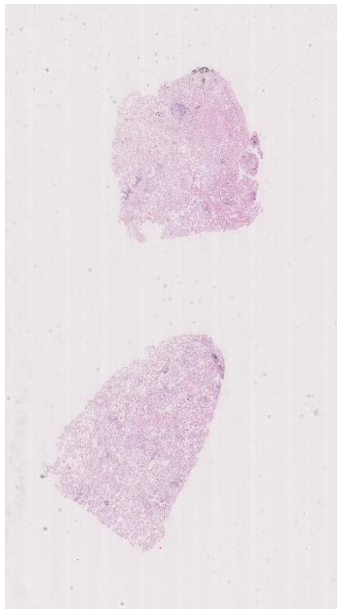

Raw Image

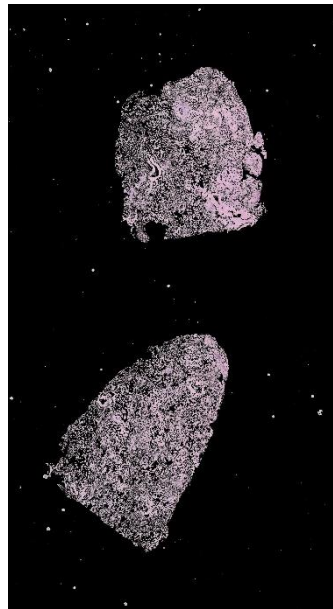

Threshold

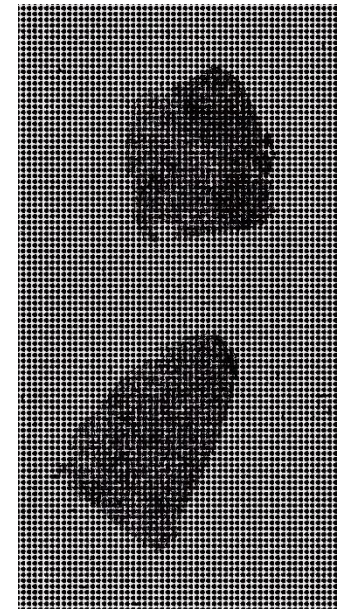

Active Contours

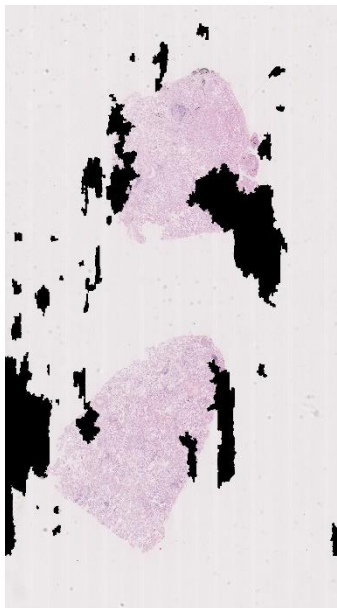

Watershed

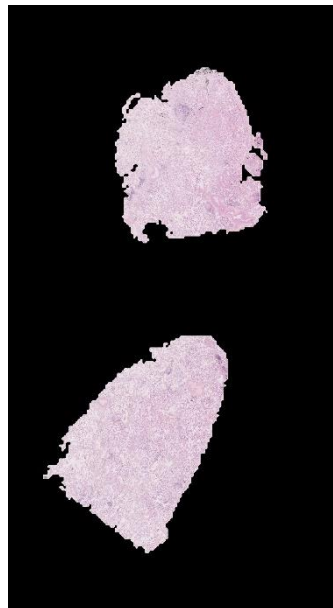

SVM using LBP features

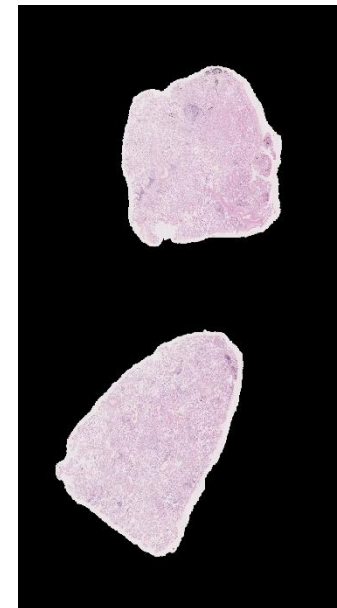

Micro-Net

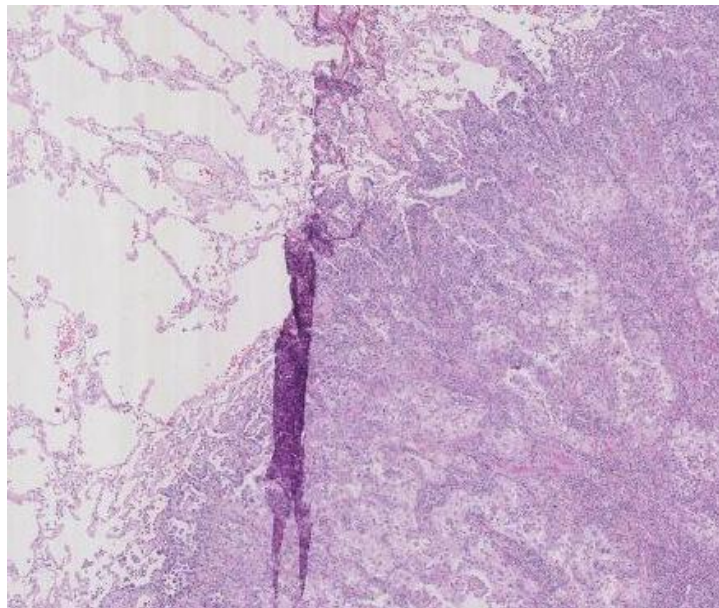

Raw Image

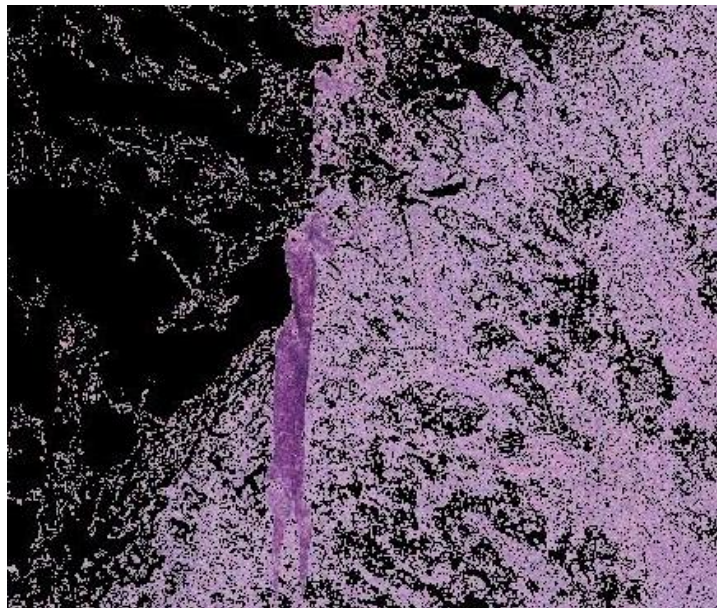

Threshold

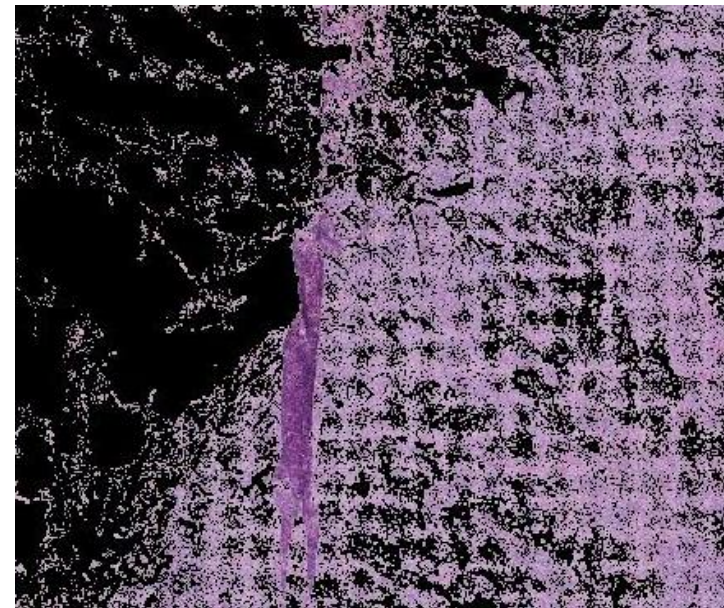

Active Contours

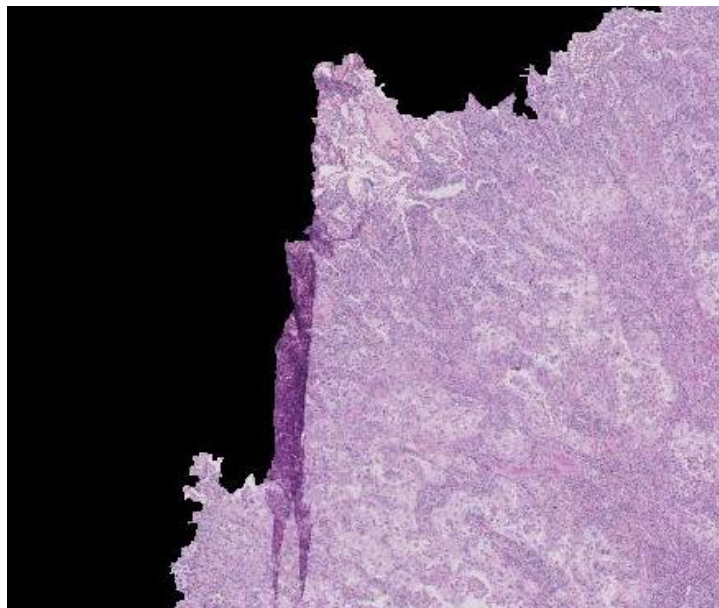

Watershed

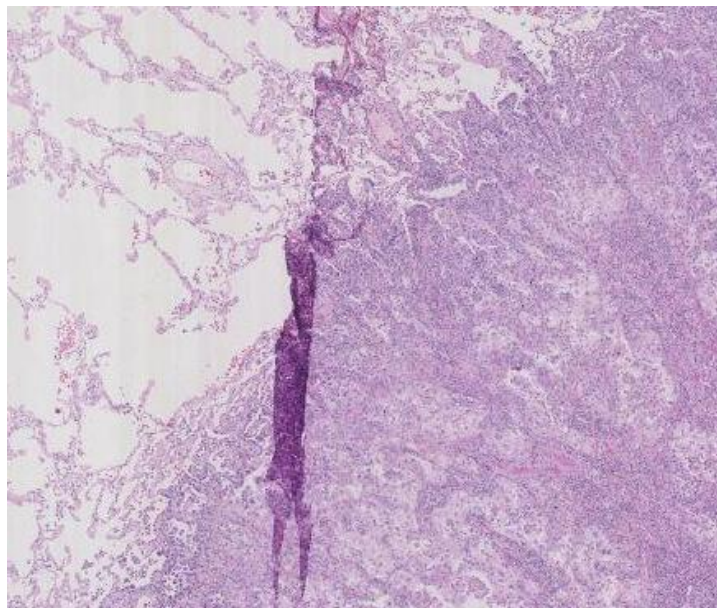

SVM using LBP features

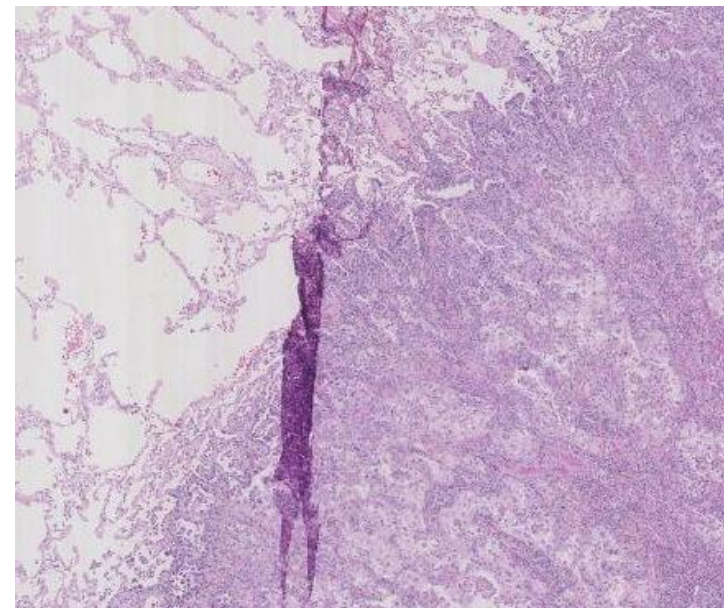

Micro-Net

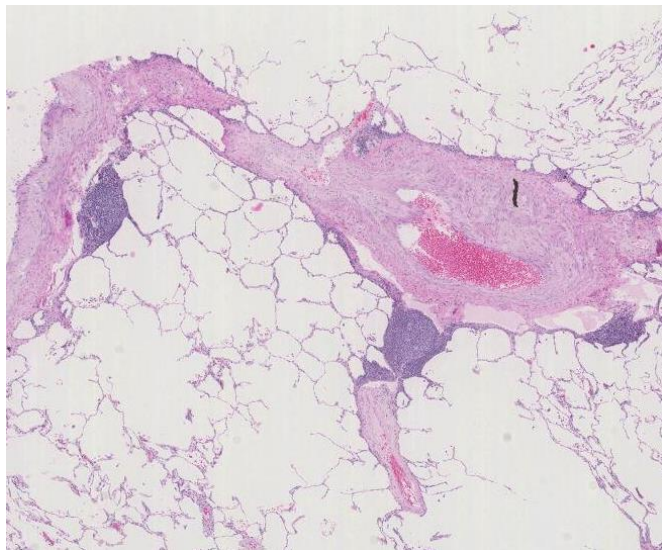

Raw Image

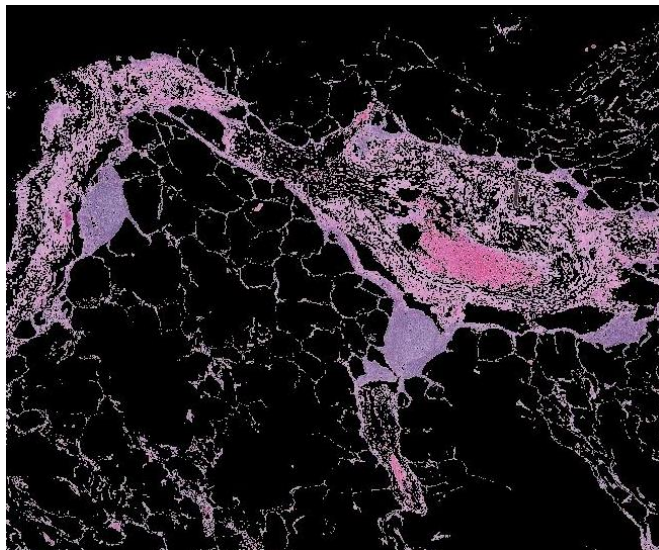

Threshold

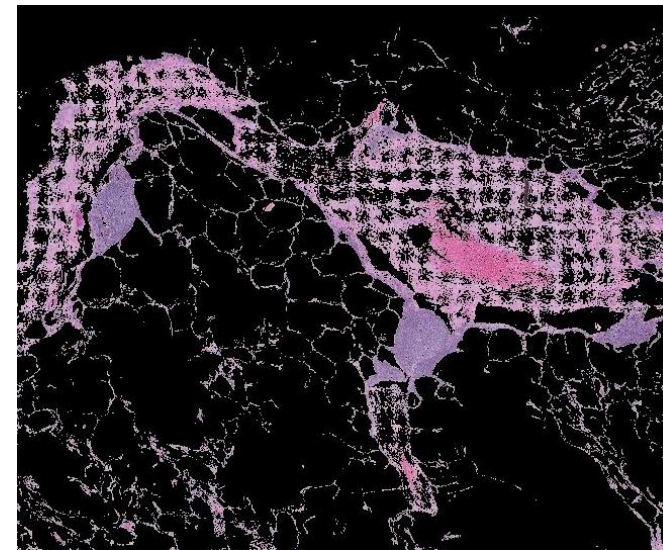

Active Contours

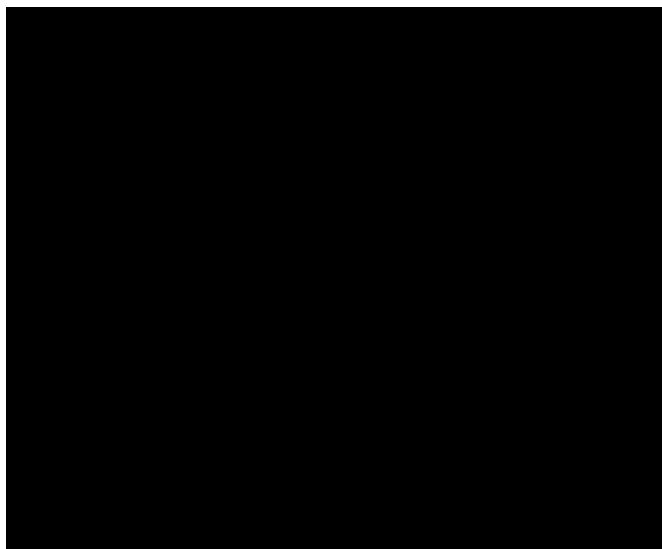

Watershed

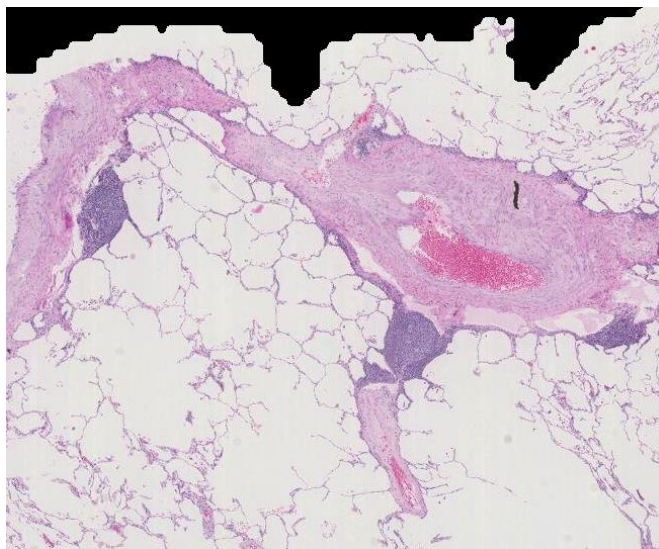

SVM using LBP features

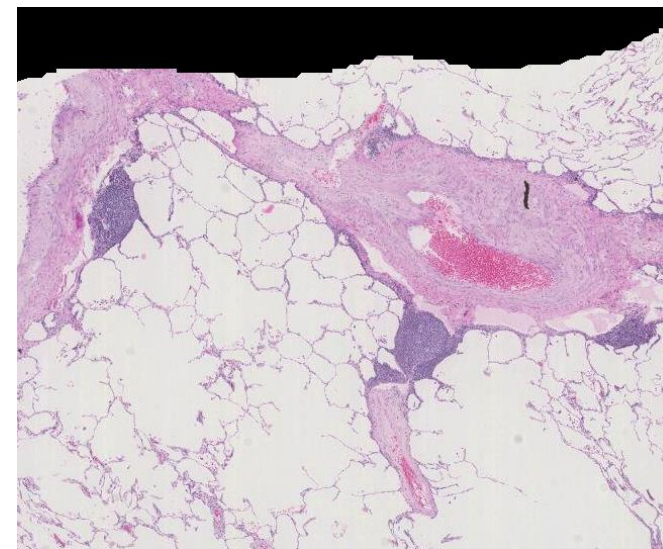

Micro-Net



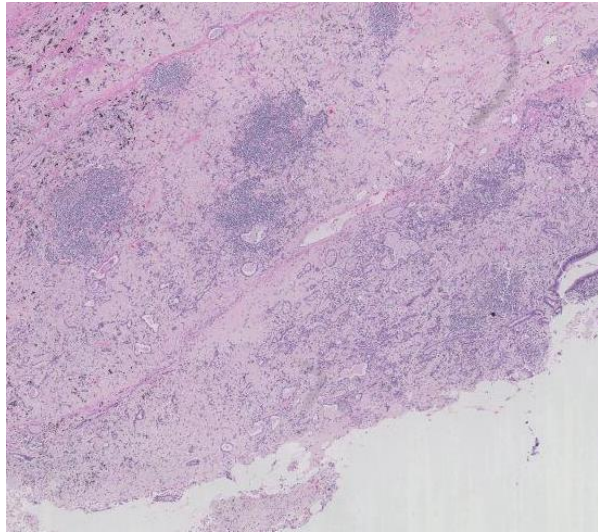

Raw Image

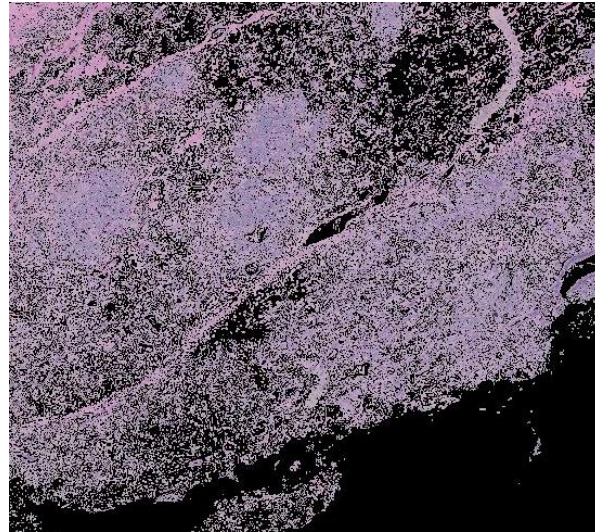

Threshold

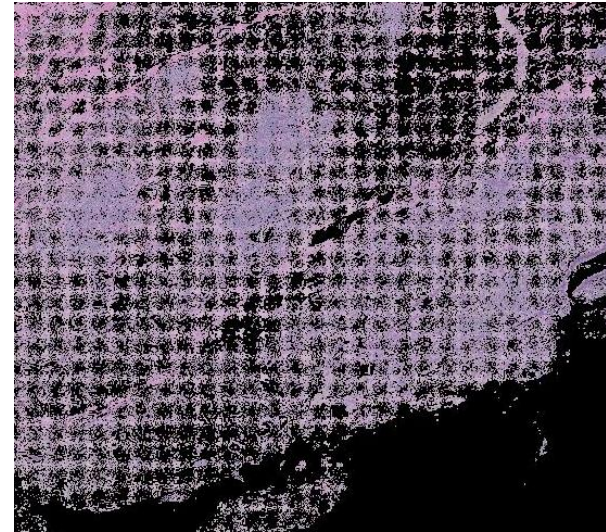

Active Contours

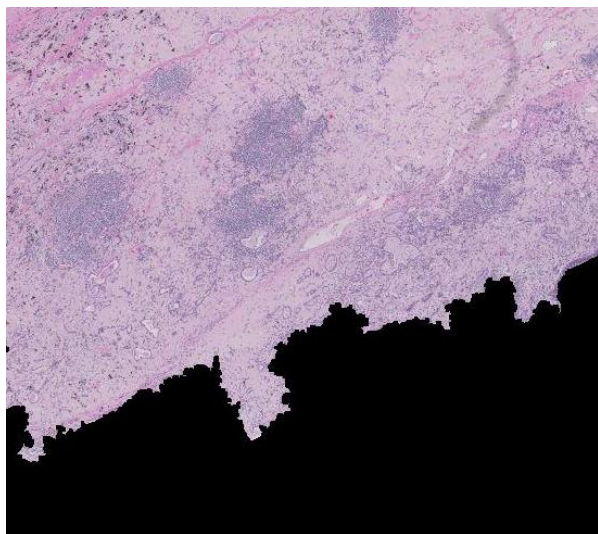

Watershed

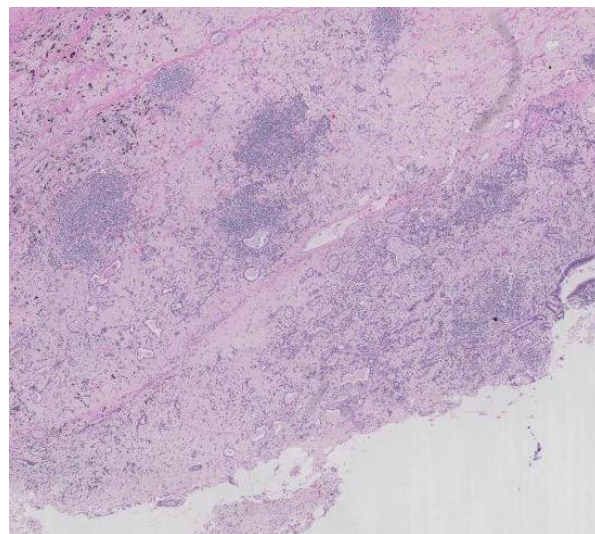

SVM using LBP features

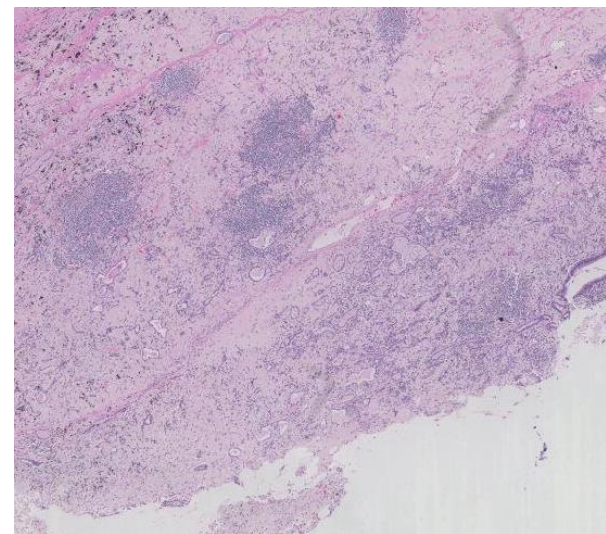

Micro-Net

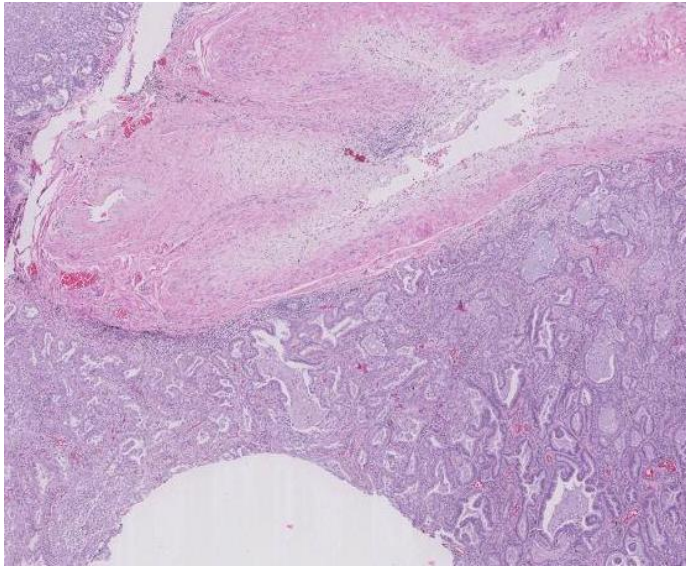

Raw Image

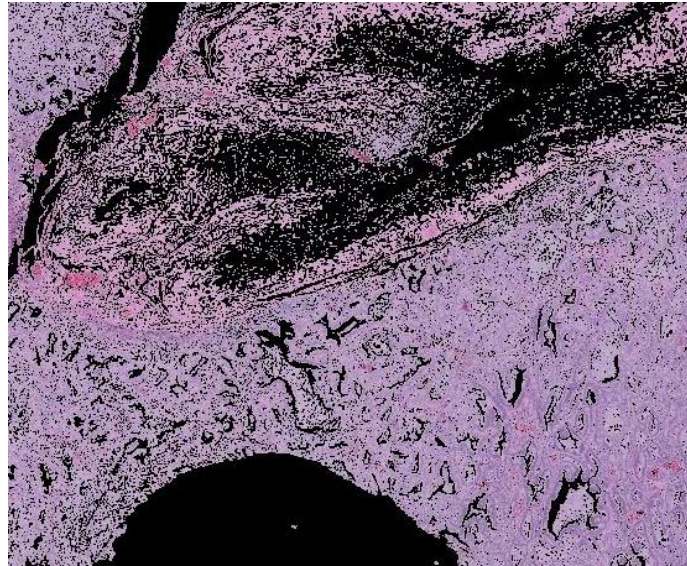

Threshold

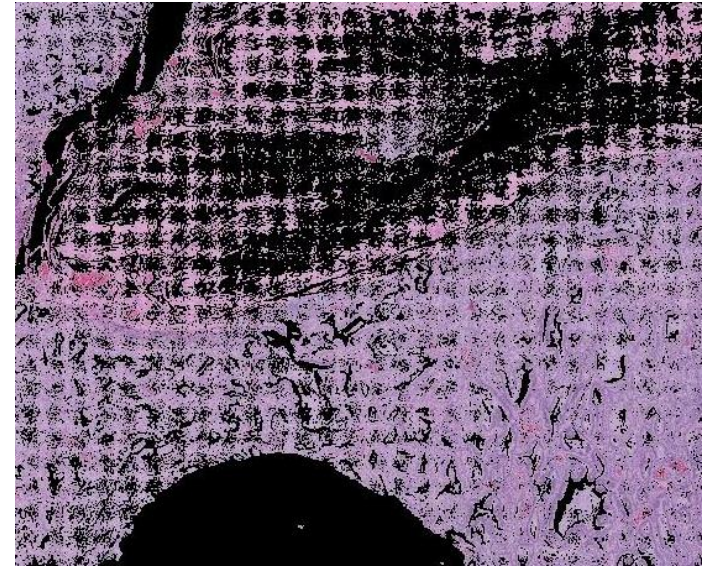

Active Contours

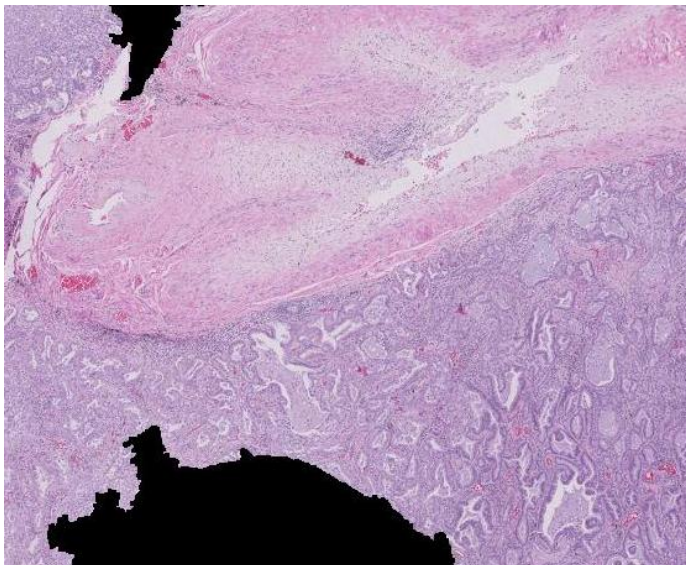

Watershed

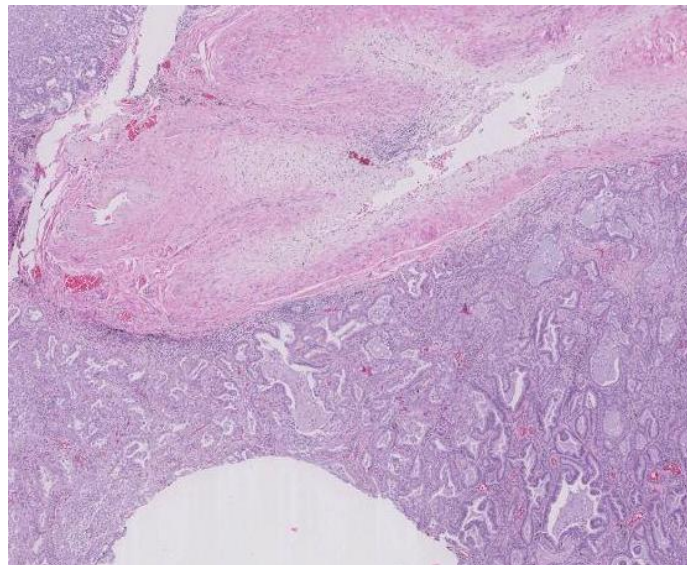

SVM using LBP features

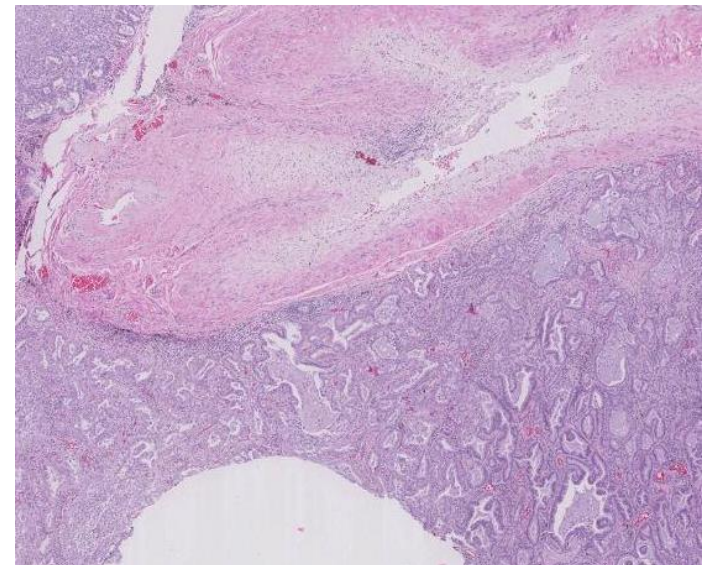

Micro-Net

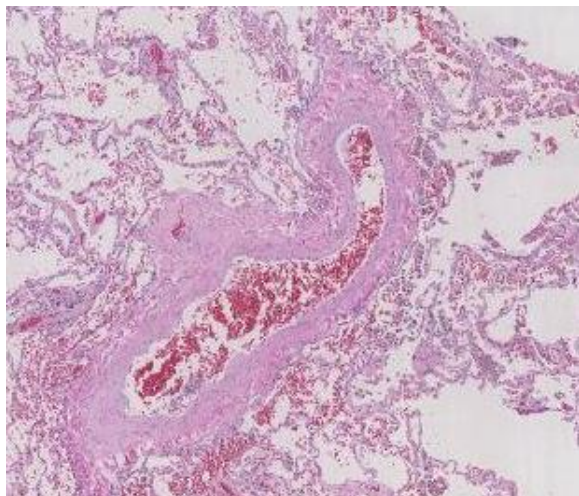

Raw Image

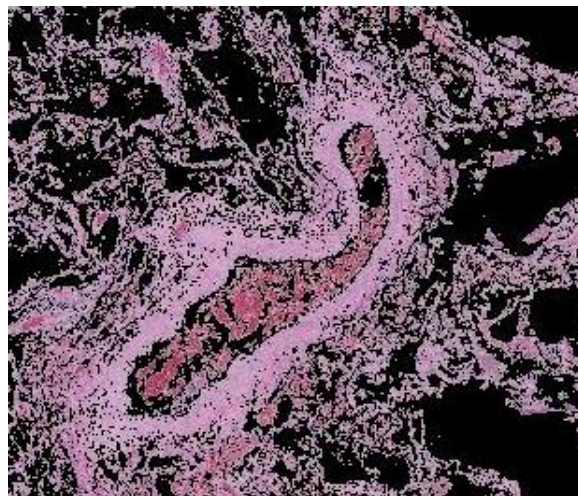

Threshold

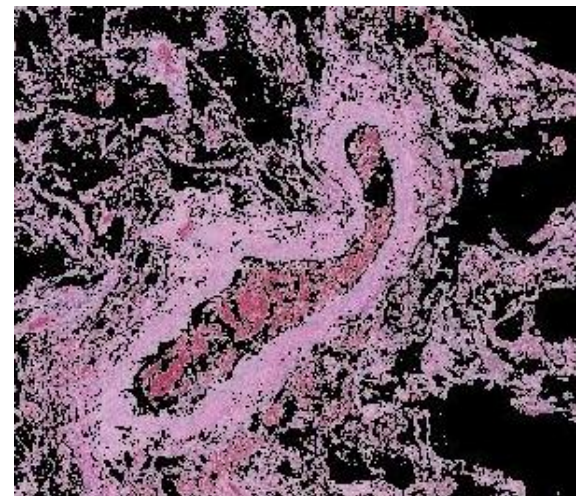

Active Contours

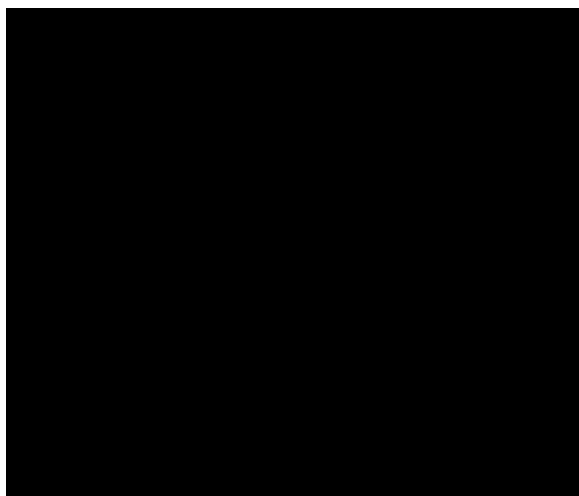

Watershed

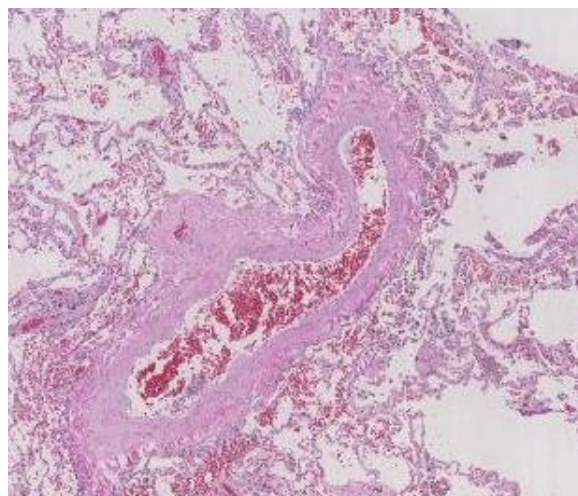

SVM using LBP features

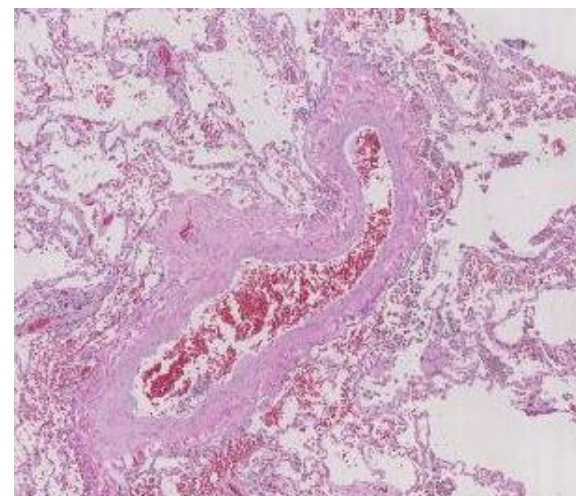

Micro-Net

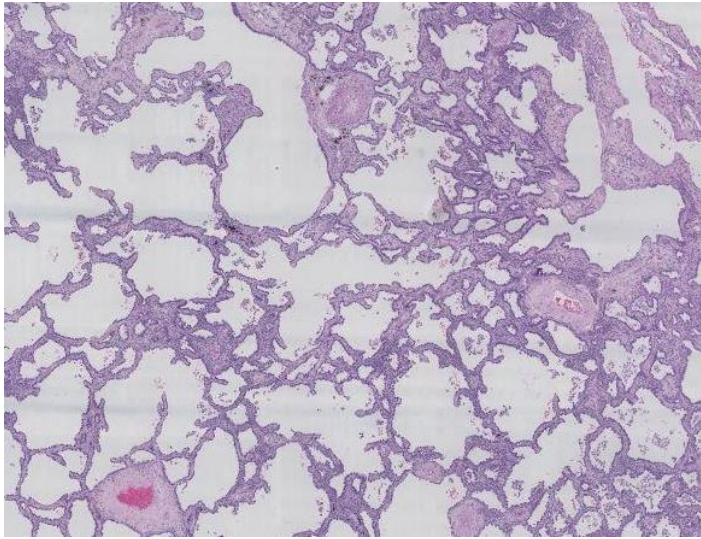

Raw Image

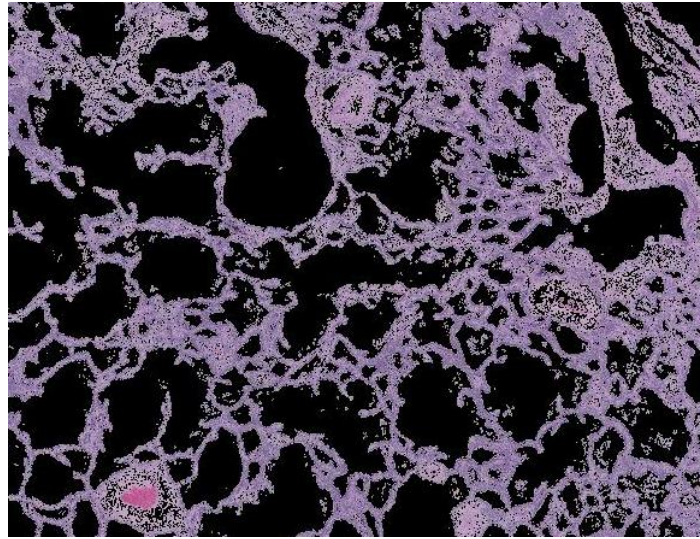

Threshold

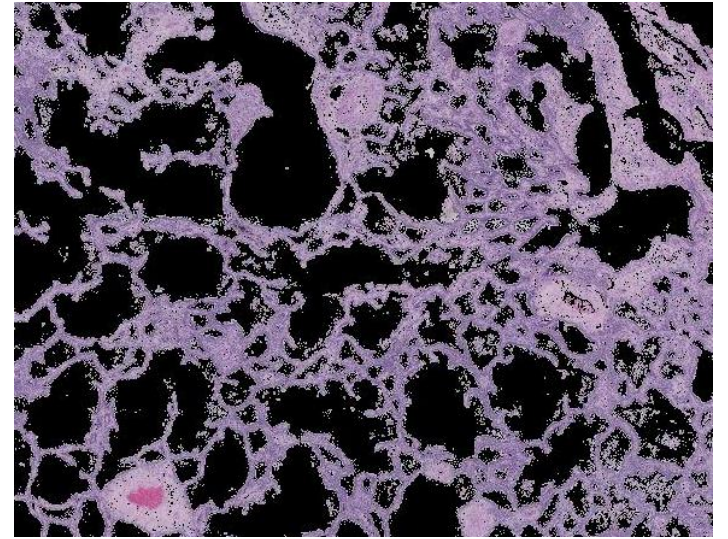

Active Contours

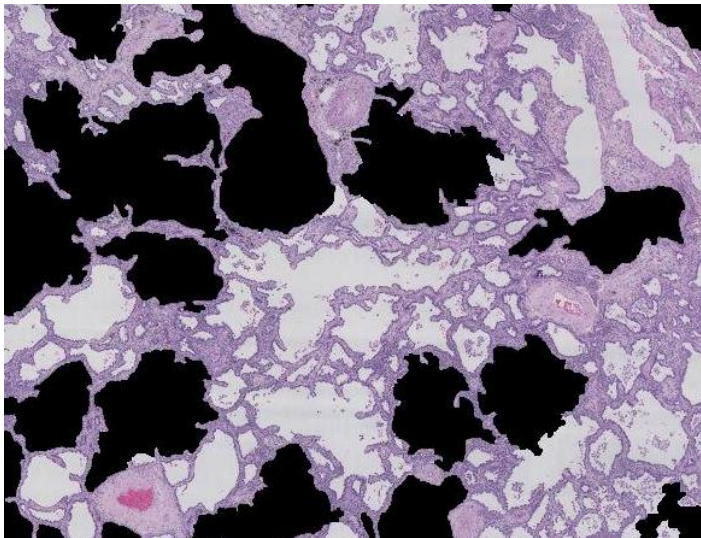

Watershed

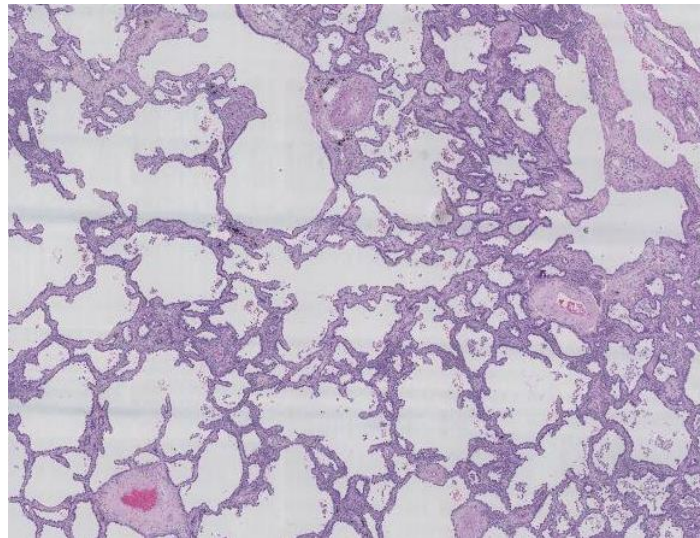

SVM using LBP features

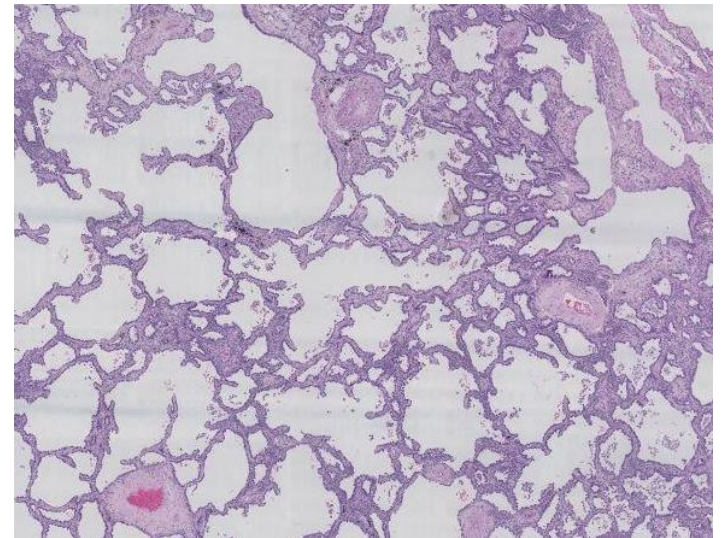

Micro-Net

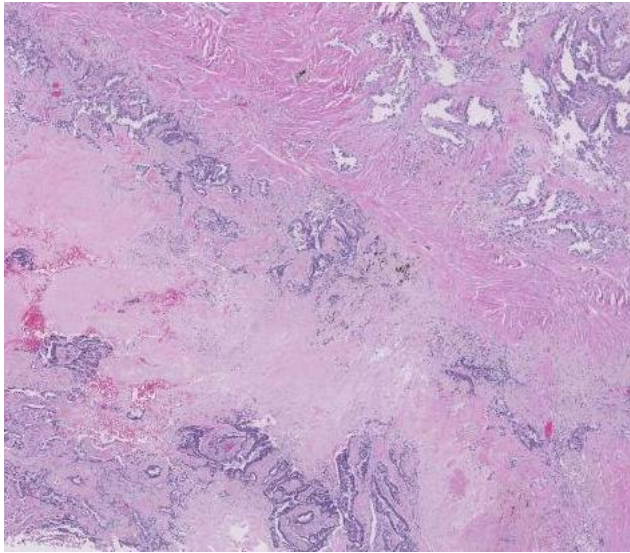

Raw Image

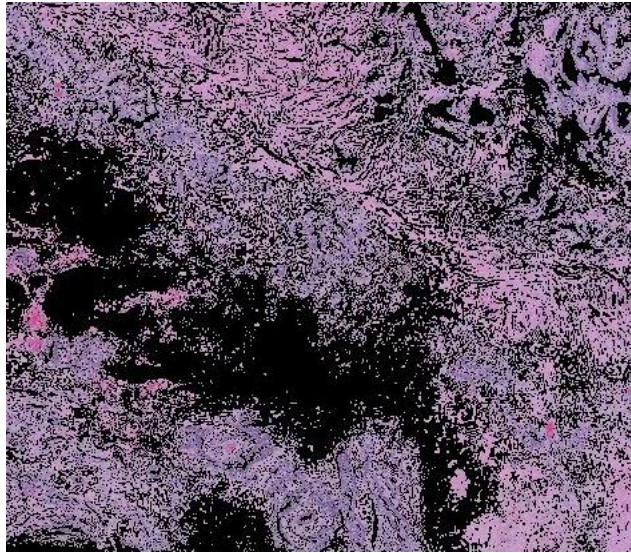

Threshold

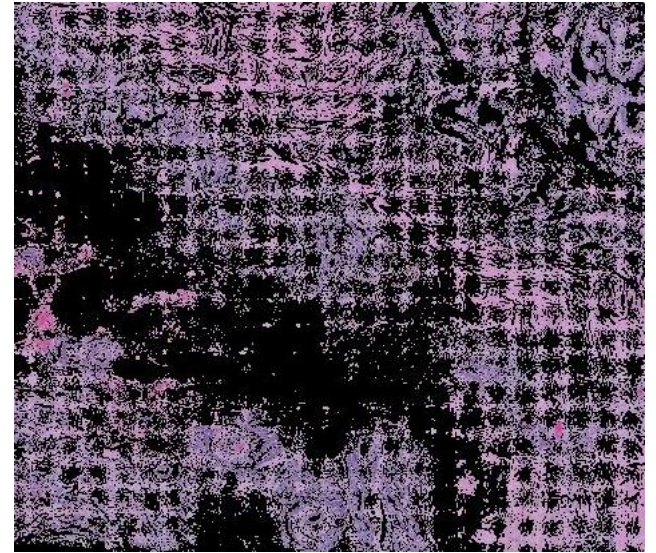

Active Contours

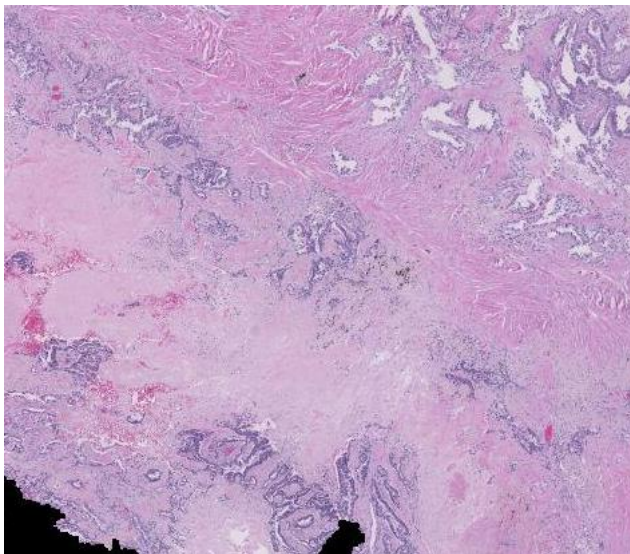

Watershed

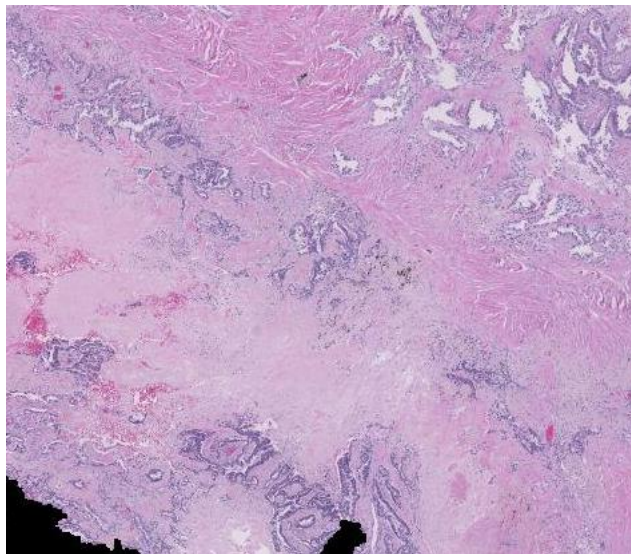

SVM using LBP features

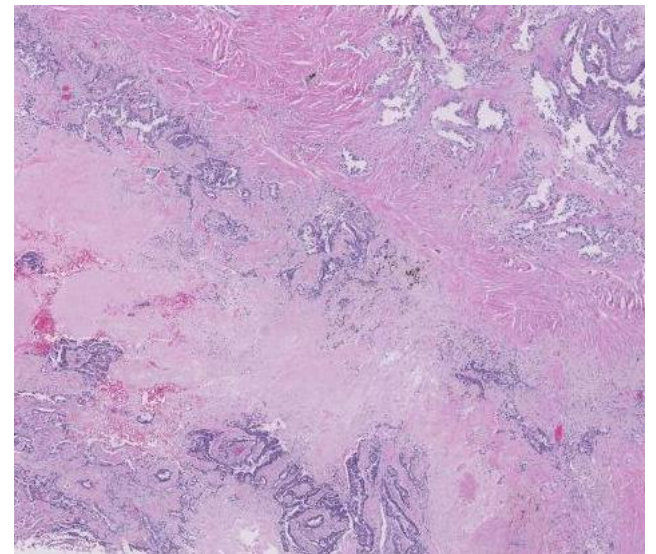

Micro-Net

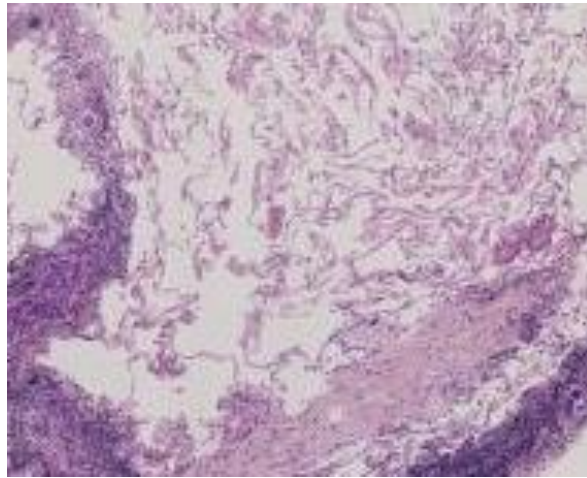

Raw Image

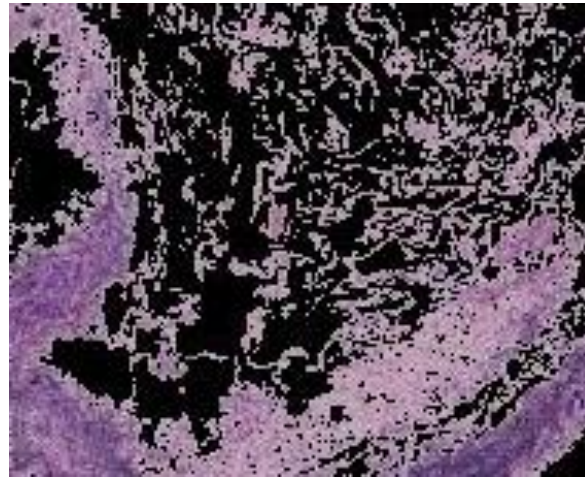

Threshold

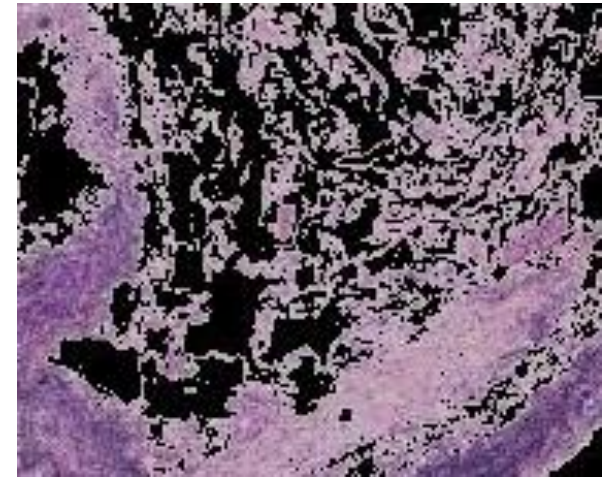

Active Contours

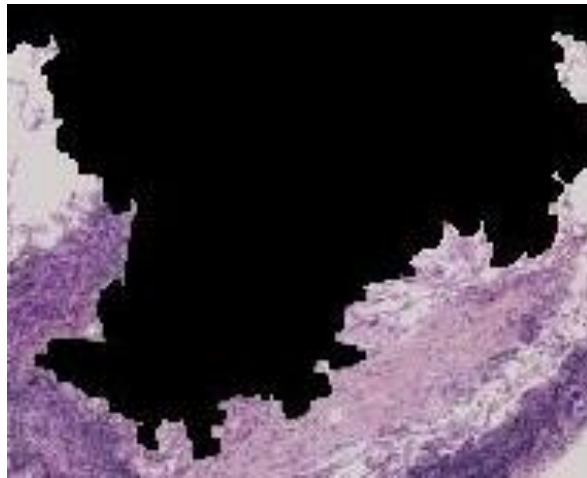

Watershed

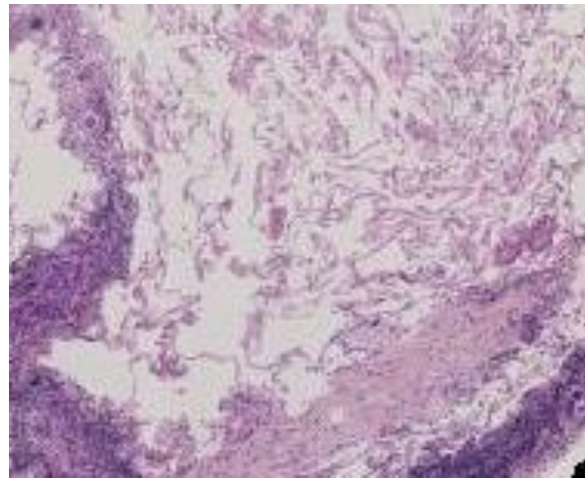

SVM using LBP features

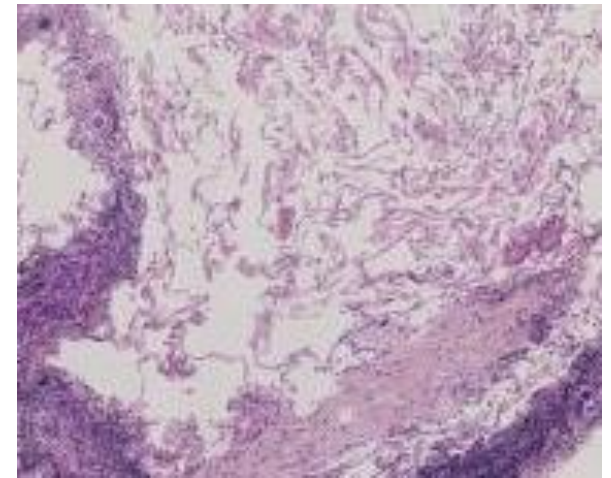

Micro-Net

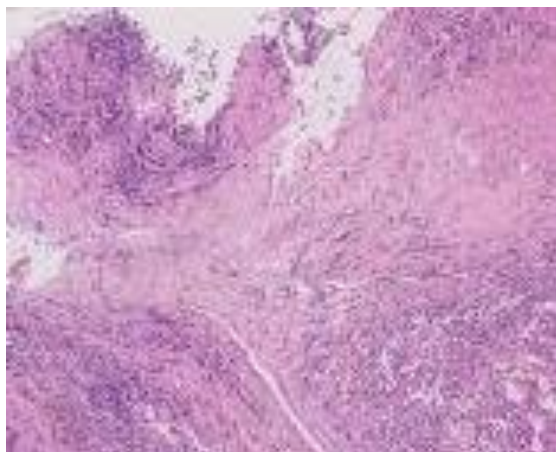

Raw Image

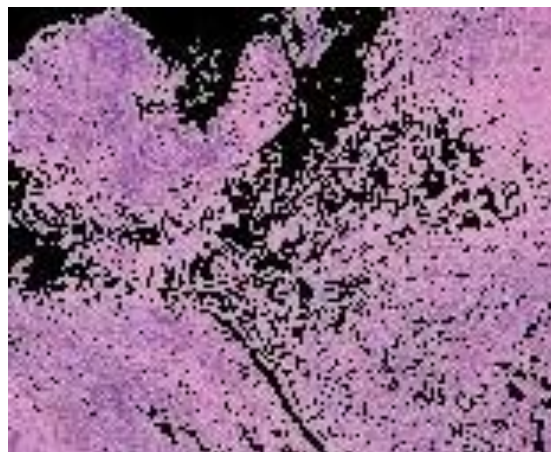

Threshold

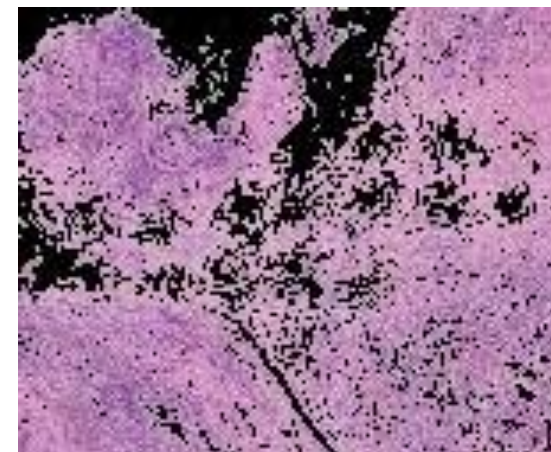

Active Contours

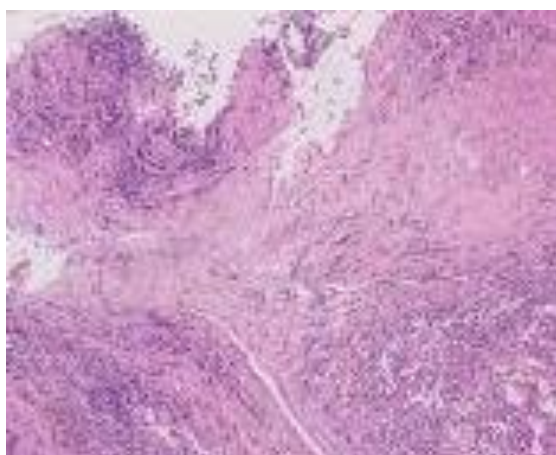

Watershed

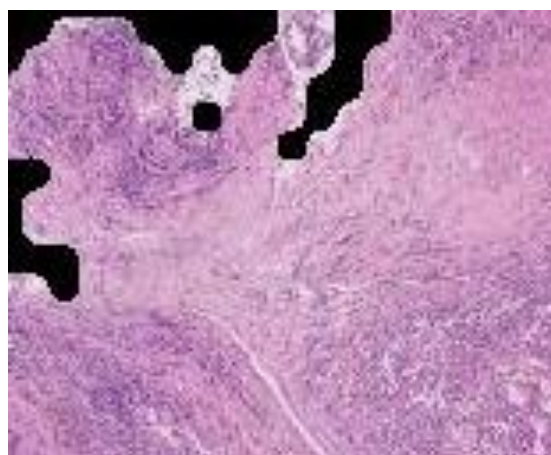

SVM using LBP features

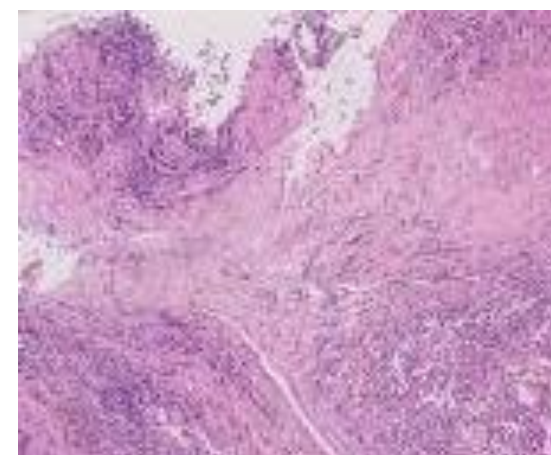

Micro-Net

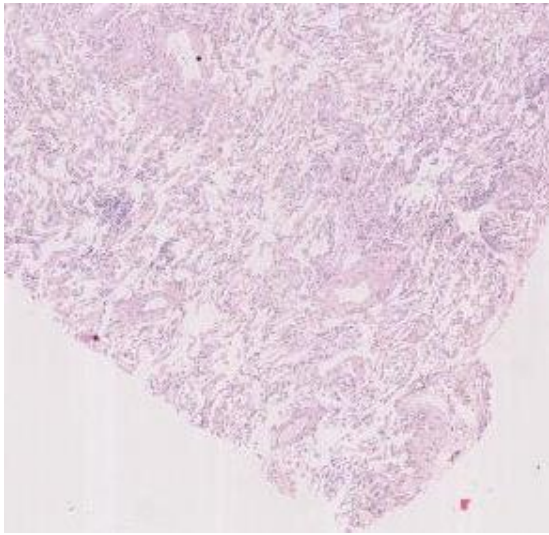

Raw Image

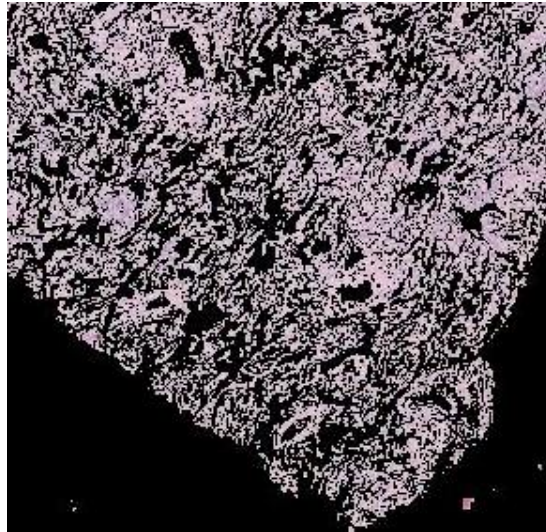

Threshold

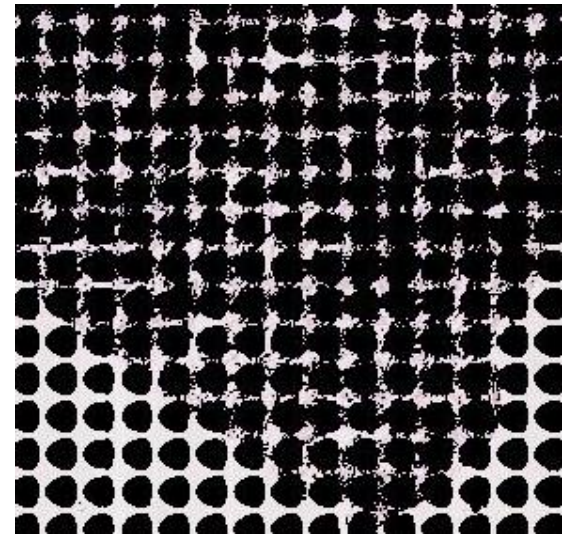

Active Contours

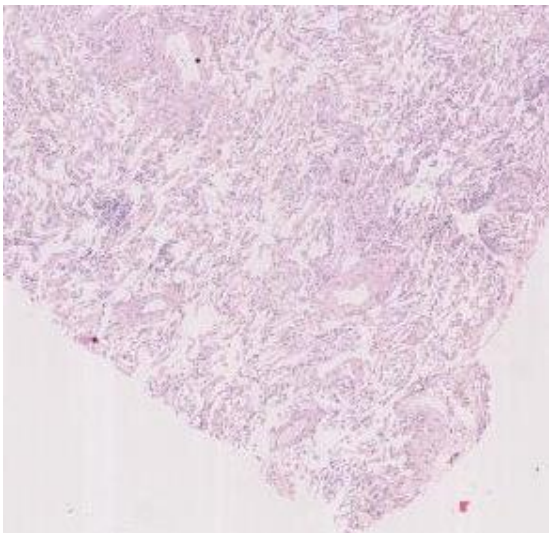

Watershed

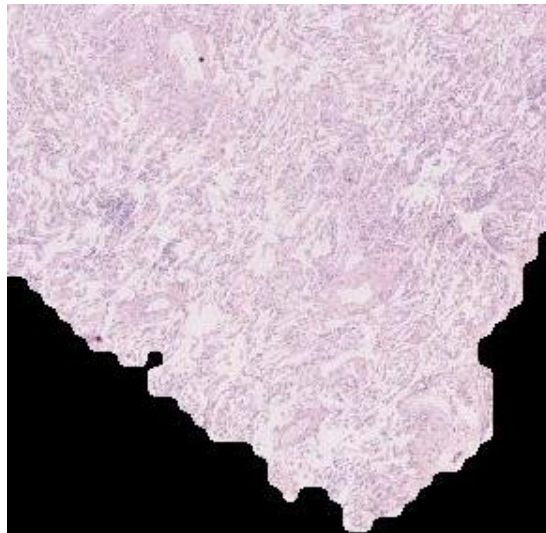

SVM using LBP features

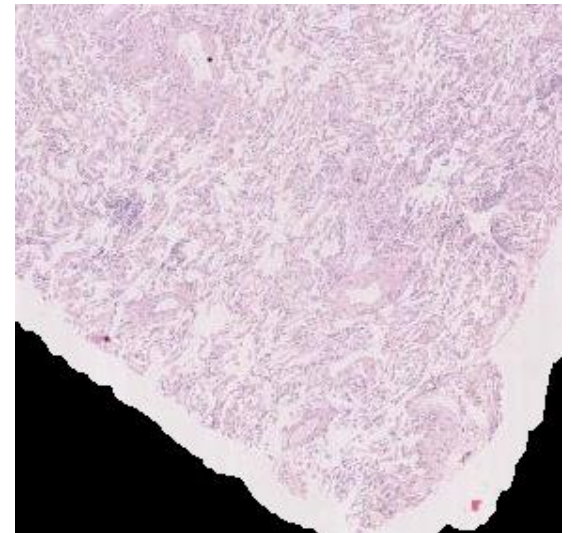

Micro-Net
